# Supplementary material
Source: PubMed Central journal article supplement (PMC3517165)

|                                                                            |     |
|----------------------------------------------------------------------------|-----|
| General Procedures.....                                                    | S01 |
| Experimental Procedure.....                                                | S02 |
| Data for $^1\text{H}$ , $^{13}\text{C}$ , IR, MS and Yield of Indoles..... | S02 |
| Computational Details.....                                                 | S05 |
| $^1\text{H}$ and $^{13}\text{C}$ Spectra for Indoles.....                  | S43 |

**General Procedures.** All chemicals were purchased from commercial suppliers and used without further purification. Analytical thin layer chromatography was carried out on pre-coated plates (silica gel 60 F254, 250  $\mu\text{m}$  thickness) and visualized with UV light or  $\text{I}_2$  chamber. Flash chromatography was performed using 60  $\text{\AA}$ , 32-63  $\mu\text{m}$  silica gel (Scientific Adsorbents).  $^1\text{H}$  NMR spectra were recorded at 600 MHz at ambient temperature with  $\text{CDCl}_3$  as the solvent.  $^{13}\text{C}$  NMR spectra were recorded at 150 MHz at ambient temperature with  $\text{CDCl}_3$  as the solvent. Chemical shifts are reported in parts per million (ppm) relative to the residual solvent peak. Infrared spectra were recorded on an ATR-FTIR spectrometer and frequency is reported in  $\text{cm}^{-1}$ . The specifications of the LC/MS are as follows: electrospray (+) ionization, mass range 150 - 1500 Da, 20 V cone voltage, and Xterra® MS C18 column (2.1 mm x 50 mm x 3.5  $\mu\text{m}$ ). Preparative HPLC specifications are as follows: 15 mL/min flow rate, Xterra Prep MS C18 OBD column (19 mm x 100 mm) and dual wavelength absorbance detector.

**General Procedure for Synthesis of Indoles.** A 10 mL vial was charged with  $\text{Cs}_2\text{CO}_3$  (0.720 g, 2.2 mmol), DPPF (0.028 g, 0.05 mmol),  $\text{Pd}_2\text{dba}_3$  (0.018 g, 0.02 mmol),  $\text{MgSO}_4$  (0.600 g, 5 mmol) dry toluene (2 mL) and a small stir bar. Vial was sealed with a teflon cap and solution was degassed by bubbling Ar through for 5 min. The appropriate *o*-bromoiodoarene (1 mmol) and primary amine (1 mmol) were added to the reaction vessel via a syringe and the reaction was stirred at 130  $^\circ\text{C}$  for 6 hours. The appropriate aldehyde or ketone (3 mmol) was then added via a syringe and the reaction was again stirred and heated at 130  $^\circ\text{C}$  for 48 hours. The reaction was allowed to cool to room temperature diluted with EtOAc (50 mL) and filtered through a bed of celite. The crude mixture was isolated under reduced pressure and purified via column chromatography. All reactions were run by strictly avoiding oxygen.

Reactions were also examined with all components present by the following method: A 10mL vial was charged with the appropriate *o*-dihaloarene (1 mmol), amine (1 mmol), aldehyde/ketone (1 mmol),  $\text{Cs}_2\text{CO}_3$  (2.2 mmol),  $\text{MgSO}_4$  (5 mmol), 1.5 mL dry toluene and a small stir bar. Solution was brought to 130  $^\circ\text{C}$  followed by addition of  $\text{Pd}_2(\text{dba})_3$  (0.02 mmol) and DPPF (0.05 mmol) dissolved in 0.5 mL toluene. Reaction was allowed to stir at 130 $^\circ\text{C}$  for 48 hours. The reaction was allowed to cool to room temperature diluted with EtOAc (50 mL) and filtered through a bed of celite. The crude mixture was isolated under reduced pressure and purified via column chromatography.

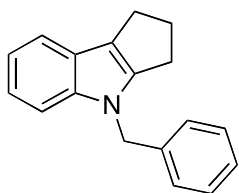

**4-benzyl-1,2,3,4-tetrahydrocyclopenta[*b*]indole (11).** Yellow oil (68%).  $^1\text{H NMR}$  (600 MHz,  $\text{CDCl}_3$ )  $\delta$  7.48 (dd,  $J = 5.8, 3.2, 1\text{H}$ ), 7.30 (t,  $J = 7.3, 2\text{H}$ ), 7.27 – 7.25 (m, 1H), 7.22 (dd,  $J = 6.0, 3.2, 1\text{H}$ ), 7.12 – 7.08 (m, 4H), 5.25 (s, 2H), 2.90 (t,  $J = 6.9, 2\text{H}$ ), 2.79 (t,  $J = 6.9, 2\text{H}$ ), 2.54 (quint,  $J = 6.9, 2\text{H}$ );  $^{13}\text{C NMR}$  (151 MHz,  $\text{CDCl}_3$ )  $\delta$  146.25, 141.11, 138.01, 128.68, 127.34, 126.60, 124.56, 120.12, 119.14, 118.56, 118.26, 109.84, 48.30, 28.41, 25.11, 24.69. IR (neat): 3086, 3051, 3030, 3005, 2950, 2921, 2899, 2850, 2818, 1666, 1612, 1580, 1494, 1454, 1376. ESI-MS  $m/z$   $[\text{M}+\text{H}]^+$ : 248.14.

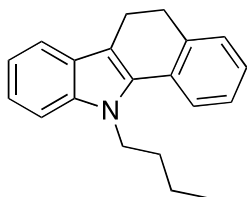

**11-butyl-6,11-dihydro-5H-benzo[*a*]carbazole (12).** Yellow oil (62%).  $^1\text{H NMR}$  (600 MHz,  $\text{CDCl}_3$ )  $\delta$  7.63 (d,  $J = 7.8, 1\text{H}$ ), 7.60 (d,  $J = 7.7, 1\text{H}$ ), 7.42 (d,  $J = 8.2, 1\text{H}$ ), 7.39 – 7.34 (m,  $J = 7.6, 2\text{H}$ ), 7.28 (t,  $J = 7.0, 1\text{H}$ ), 7.24 (t,  $J = 7.4, 1\text{H}$ ), 7.18 (t,  $J = 7.0, 1\text{H}$ ), 4.44 (t,  $J = 8.0, 2\text{H}$ ), 3.02 (dd,  $J = 7.2, 2.1, 2\text{H}$ ), 2.97 (dd,  $J = 7.6, 2.1, 2\text{H}$ ), 1.98 (quint,  $J = 7.7, 2\text{H}$ ), 1.51 (sextet,  $J = 7.3, 2\text{H}$ ), 1.05 (t,  $J = 7.3, 3\text{H}$ );  $^{13}\text{C NMR}$  (151 MHz,  $\text{CDCl}_3$ )  $\delta$  138.74, 138.26, 134.28, 129.80, 128.76, 126.74, 126.23, 126.17, 122.01, 121.98, 119.46, 118.81, 114.24, 109.75, 45.01, 32.63, 30.86, 20.33, 20.15, 13.91. IR (neat): 3056, 3032, 2956, 2928, 2891, 2871, 1600, 1577, 1536, 1491, 1462, 1442, 1426, 1306. ESI-MS  $m/z$   $[\text{M}+\text{H}]^+$ : 276.16.

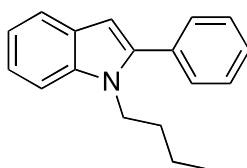

**1-butyl-2-phenyl-1H-indole (13).** Yellow oil (69%).  $^1\text{H NMR}$  (600 MHz,  $\text{CDCl}_3$ )  $\delta$  7.65 (ddd,  $J = 7.8, 1.1, 0.6, 1\text{H}$ ), 7.52 – 7.46 (m, 4H), 7.43 – 7.39 (m, 2H), 7.24 (td,  $J = 7.0, 1.2, 1\text{H}$ ), 7.14 (td,  $J = 7.1, 1.2, 1\text{H}$ ), 4.16 (t,  $J = 7.4, 2\text{H}$ ), 1.68 (quint,  $J = 7.4, 2\text{H}$ ), 1.20 (sextet,  $J = 7.4, 2\text{H}$ ), 0.80 (t,  $J = 7.4, 3\text{H}$ );  $^{13}\text{C NMR}$  (151 MHz,  $\text{CDCl}_3$ )  $\delta$  141.36, 137.33, 133.30, 129.44, 128.44, 128.17, 127.86, 121.41, 120.52, 119.68, 110.04, 102.00, 43.73, 32.07, 19.99, 13.61. IR (neat): 3075, 308, 3030, 2957, 2930, 2872, 1601, 1509, 1460, 1393. ESI-MS  $m/z$   $[\text{M}+\text{H}]^+$ : 250.18.

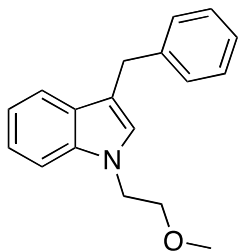

**3-benzyl-1-(2-methoxyethyl)-1H-indole (14).** Yellow oil (65%).  $^1\text{H NMR}$  (600 MHz,  $\text{CDCl}_3$ )  $\delta$  7.50 (d,  $J = 7.8, 1\text{H}$ ), 7.33 (d,  $J = 7.8, 1\text{H}$ ), 7.30 – 7.26 (m, 4H), 7.20 (t,  $J = 7.0, 2\text{H}$ ), 7.06 (t,  $J = 7.43, 1\text{H}$ ), 6.88 (s, 1H), 4.23 (t,  $J = 5.7, 2\text{H}$ ), 4.11 (s, 2H), 3.69 (t,  $J = 5.7, 2\text{H}$ ), 3.30 (s, 3H);  $^{13}\text{C NMR}$  (151 MHz,  $\text{CDCl}_3$ )  $\delta$  141.34, 136.58, 128.66, 128.26, 128.00, 126.64, 125.78, 121.52, 119.32, 118.85, 114.45, 109.18, 71.60, 59.03, 46.00, 31.52. IR (neat): 3057, 3025, 2893, 2829, 2135, 1930, 1681, 1602, 1466, 1453, 1359, 1332. ESI-MS  $m/z$   $[\text{M}+\text{H}]^+$ : 266.13.

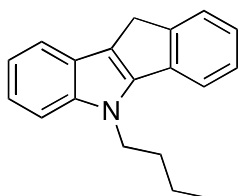

**5-butyl-5,10-dihydroindeno[1,2-*b*]indole (15).** Yellow oil (59%).  $^1\text{H NMR}$  (600 MHz,  $\text{CDCl}_3$ )  $\delta$  7.65 (d,  $J = 7.8, 1\text{H}$ ), 7.59 (d,  $J = 7.6, 1\text{H}$ ), 7.56 (d,  $J = 7.4, 1\text{H}$ ), 7.42 – 7.40 (d,  $J = 7.5, 1\text{H}$ ), 7.36 (t,  $J = 7.5, 1\text{H}$ ), 7.25 – 7.20 (m, 2H), 7.15 (td,  $J = 7.7, 1.3, 1\text{H}$ ), 4.44 (t,  $J = 7.2, 2\text{H}$ ), 3.74 (s, 2H), 1.91 (quint,  $J = 7.5, 2\text{H}$ ), 1.45 (sextet,  $J =$

7.3, 2H), 0.96 (t, J = 7.3, 3H); <sup>13</sup>C NMR (151 MHz, CDCl<sub>3</sub>) δ 148.27, 144.21, 141.27, 135.44, 126.54, 125.62, 124.53, 124.06, 121.07, 120.37, 119.43, 119.08, 117.76, 110.00, 44.62, 32.97, 30.15, 20.35, 13.93. IR (neat): 3351, 3247, 3072, 2957, 2925, 2872, 1737, 1461, 1439. ESI-MS *m/z* [M+H]<sup>+</sup>: 262.04.

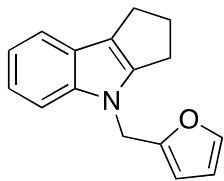

**4-(furan-2-ylmethyl)-1,2,3,4-tetrahydrocyclopenta[*b*]indole (16).** Yellow oil (63%). <sup>1</sup>H NMR (600 MHz, CDCl<sub>3</sub>) δ 7.44 (d, J = 7.8, 1H), 7.35 (d, J = 8.2, 1H), 7.34 – 7.33 (m, 1H), 7.13 (t, J = 7.6, 1H), 7.09 (t, J = 7.6, 1H), 6.29 (dd, J = 3.0, 1.8, 1H), 6.19 (d, J = 3.3, 1H), 5.17 (s, 3H), 2.87 (t, J = 7.1, 4H), 2.55 (quint, J = 7.2, 2H); <sup>13</sup>C NMR (151 MHz, CDCl<sub>3</sub>) δ 150.86, 145.92, 142.31, 140.86, 124.59, 120.14, 119.23, 118.57, 118.36, 110.36, 109.63, 107.66, 41.55, 28.35, 24.94, 24.63. IR (neat): ESI-MS *m/z* [M+H]<sup>+</sup>: 238.11.

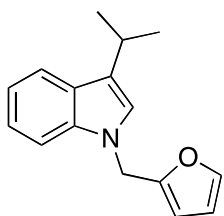

**1-(furan-2-ylmethyl)-3-isopropyl-1H-indole (17).** Yellow oil (58%). <sup>1</sup>H NMR (600 MHz, CDCl<sub>3</sub>) δ 7.63 (d, J = 7.8, 1H), 7.37 (d, J = 8.3, 1H), 7.34 (dd, J = 1.8, 0.8, 1H), 7.20 (t, J = 7.3, 1H), 7.10 (t, J = 7.8, 1H), 6.88 (s, 1H), 6.30 – 6.29 (m, 1H), 6.21 – 6.19 (m, 1H), 5.20 (s, 2H), 3.19 (septet, J = 6.9, 1H), 1.35 (d, J = 6.6, 6H); <sup>13</sup>C NMR (151 MHz, CDCl<sub>3</sub>) δ 150.75, 142.41, 136.63, 127.43, 123.24, 123.06, 121.56, 119.55, 118.72, 110.36, 109.38, 107.87, 42.90, 25.44, 23.34 (<sup>13</sup>C spectrum includes grease peak at 29.70.) IR (neat): 3116, 3054, 2765, 2711, 2665, 2511, 2364, 2173, 2016, 1954, 1529. ESI-MS *m/z* [M+H]<sup>+</sup>: 240.22.

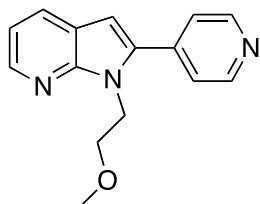

**1-(2-methoxyethyl)-2-(pyridin-4-yl)-1H-pyrrolo[2,3-*b*]pyridine (18).** Deep orange oil (60%). <sup>1</sup>H NMR (600 MHz, CDCl<sub>3</sub>) δ 8.72 (d, J = 4.4, 2H), 8.38 (d, J = 4.8, 1H), 7.93 (d, J = 7.8, 1H), 7.60 (d, J = 4.5, 1H), 7.12 (dd, J = 7.7, 4.7, 1H), 6.62 (s, 1H), 4.53 (t, J = 5.6, 2H), 3.80 (t, J = 5.6, 2H), 3.20 (s, 3H); <sup>13</sup>C NMR (151 MHz, CDCl<sub>3</sub>) δ 150.05, 149.44, 143.60, 140.22, 139.09, 128.80, 123.69, 120.40, 116.67, 101.69, 70.89, 58.81, 42.91. IR (neat): 3382, 3128, 3050, 2923, 2889, 2860, 2815, 2182, 1597, 1572, 1476. ESI-MS *m/z* [M+H]<sup>+</sup>: 254.13.

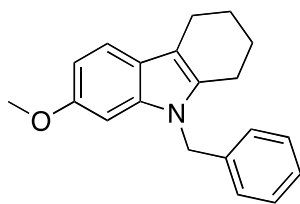

**9-benzyl-7-methoxy-2,3,4,9-tetrahydro-1H-carbazole (19).** Yellow oil (52%). <sup>1</sup>H NMR (600 MHz, CDCl<sub>3</sub>) δ 7.37 (d, J = 8.4, 1H), 7.27 (t, J = 7.2, 2H), 7.22 (t, J = 7.0, 1H), 7.01 (d, J = 7.6, 2H), 6.75 (dd, J = 8.5, 2.2, 1H), 6.70 (s, 1H), 5.19 (s, 2H), 3.78 (s, 3H), 2.73 (t, J = 5.6, 2H), 2.60 (t, J = 5.6, 2H), 1.93 – 1.87 (m, 2H), 1.87 – 1.81 (m, 2H); <sup>13</sup>C NMR (151 MHz, CDCl<sub>3</sub>) δ 155.72, 138.20, 137.22, 134.39, 128.66, 127.11, 126.14, 122.03, 118.22, 109.66, 107.81, 93.62, 55.81, 46.21, 23.21, 23.18, 22.10, 21.10. IR (neat): 3364, 3139, 3077, 3033, 2920, 2871, 2727, 2670, 1947, 1492. ESI-MS *m/z* [M+H]<sup>+</sup>: 292.25.

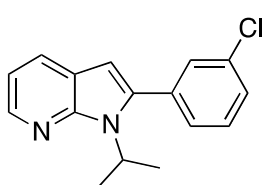

**2-(3-chlorophenyl)-1-isopropyl-1H-pyrrolo[2,3-*b*]pyridine (20).** Deep orange oil (54%). <sup>1</sup>H NMR (600 MHz, CDCl<sub>3</sub>) δ 8.33 (d, J = 5.0, 1H), 7.87 (d, J = 7.7, 1H), 7.48 (s, 1H),

7.42 – 7.40 (m, 2H), 7.36 – 7.34 (m, 1H), 7.06 (ddd, J = 7.8, 4.7, 0.9, 1H), 6.40 (s, 1H), 4.67 (sept., J = 6.9, 1H), 1.71 (d, J = 7.0, 6H); <sup>13</sup>C NMR (151 MHz, CDCl<sub>3</sub>) δ 148.79, 142.38, 139.90, 135.10, 134.38, 129.67, 129.55, 128.34, 128.13, 127.67, 120.86, 115.91, 100.55, 48.44, 21.40. IR (neat): 3157, 3068, 2888, 2777, 2737, 1580, 1467. ESI-MS *m/z* [M+H]<sup>+</sup>: 271.14.

## Computational Methods

All calculations were carried out using GAUSSIAN09:

Gaussian 09, Revision B.01,  
M. J. Frisch, G. W. Trucks, H. B. Schlegel, G. E. Scuseria,  
M. A. Robb, J. R. Cheeseman, G. Scalmani, V. Barone, B. Mennucci,  
G. A. Petersson, H. Nakatsuji, M. Caricato, X. Li, H. P. Hratchian,  
A. F. Izmaylov, J. Bloino, G. Zheng, J. L. Sonnenberg, M. Hada,  
M. Ehara, K. Toyota, R. Fukuda, J. Hasegawa, M. Ishida, T. Nakajima,  
Y. Honda, O. Kitao, H. Nakai, T. Vreven, J. A. Montgomery, Jr.,  
J. E. Peralta, F. Ogliaro, M. Bearpark, J. J. Heyd, E. Brothers,  
K. N. Kudin, V. N. Staroverov, T. Keith, R. Kobayashi, J. Normand,  
K. Raghavachari, A. Rendell, J. C. Burant, S. S. Iyengar, J. Tomasi,  
M. Cossi, N. Rega, J. M. Millam, M. Klene, J. E. Knox, J. B. Cross,  
V. Bakken, C. Adamo, J. Jaramillo, R. Gomperts, R. E. Stratmann,  
O. Yazyev, A. J. Austin, R. Cammi, C. Pomelli, J. W. Ochterski,  
R. L. Martin, K. Morokuma, V. G. Zakrzewski, G. A. Voth,  
P. Salvador, J. J. Dannenberg, S. Dapprich, A. D. Daniels,  
O. Farkas, J. B. Foresman, J. V. Ortiz, J. Cioslowski,  
and D. J. Fox, Gaussian, Inc., Wallingford CT, 2010.

All structures were optimized (in the gas phase) using B3LYP (Becke, A. D. *J. Chem. Phys.*, 1993, **98**, 5648-5652; Becke, A. D. *J. Chem. Phys.* 1993, **98**, 1372-1377; Lee, C.; Yang, W.; Parr, R. G. *Phys. Rev. B.*, 1988, **37**, 785-789; Stephens, P. J.; Devlin, F. J.; Chabalowski, C. F.; Frisch, M. J. *J. Phys. Chem.*, 1994, **98**, 11623-11627) with the 6-31G(d) basis set for C, H, N and O and the LANL2DZ basis set (Hay, P. J.; Wadt, W. R. *J. Chem. Phys.* 1985, **82**, 270-283) for Pd, P and Br. This level of theory has been used previously for studying Heck reactions (e.g., Wu, W.-Q.; Peng, Q.; Dong, D.-X.; Hou, X.-L.; Wu, Y.-D. *J. Am. Chem. Soc.* **2008**, *130*, 9717-9725). Frequency analysis was used to confirm that optimized structures were minima or transition state structures. Energies reported in the text are free energies (298K) and include zero point energy corrections (unscaled). For the system in Figure 1, intrinsic reaction coordinate (IRC) calculations (Gonzalez, C.; Schlegel, H. B. *J. Phys. Chem.*, 1990, **94**, 5523-5527; Fukui, K. *Acc. Chem. Res.*, 1981, **14**, 363-368; Fukui, K., *Acc. Chem. Res.*, 1981, **14**, 363-368) were used to verify the nature of transition state structures (IRC plots are shown below).

Coordinates, energies, and IRC plots follow.

**Structures from Figure 1 in text**

**A**

Zero-point correction= 0.222212 (Hartree/Particle)  
 Thermal correction to Energy= 0.239928  
 Thermal correction to Enthalpy= 0.240873  
 Thermal correction to Gibbs Free Energy= 0.174718  
 Sum of electronic and zero-point Energies= -546.572610  
 Sum of electronic and thermal Energies= -546.554893  
 Sum of electronic and thermal Enthalpies= -546.553949  
 Sum of electronic and thermal Free Energies= -546.620104

| Center<br>Number | Atomic<br>Number | Atomic<br>Type | Coordinates (Angstroms) |           |           |
|------------------|------------------|----------------|-------------------------|-----------|-----------|
|                  |                  |                | X                       | Y         | Z         |
| 1                | 6                | 0              | 1.166582                | 0.588630  | -2.426110 |
| 2                | 6                | 0              | 0.824515                | 0.257254  | -1.119107 |
| 3                | 6                | 0              | 1.787796                | -0.223267 | -0.245948 |
| 4                | 6                | 0              | 3.119863                | -0.400473 | -0.603455 |
| 5                | 6                | 0              | 3.465601                | -0.068192 | -1.918700 |
| 6                | 6                | 0              | 2.504147                | 0.416656  | -2.812658 |
| 7                | 1                | 0              | 0.448304                | 0.972868  | -3.144128 |
| 8                | 1                | 0              | 3.860399                | -0.781221 | 0.093539  |
| 9                | 1                | 0              | 4.492921                | -0.187715 | -2.248543 |
| 10               | 1                | 0              | 2.798634                | 0.668648  | -3.827563 |
| 11               | 7                | 0              | 1.162444                | -0.457638 | 1.071769  |
| 12               | 6                | 0              | 1.678760                | 0.459579  | 2.126401  |
| 13               | 1                | 0              | 1.635315                | 1.485342  | 1.759617  |
| 14               | 1                | 0              | 1.059462                | 0.365893  | 3.022340  |
| 15               | 1                | 0              | 2.714095                | 0.204618  | 2.380007  |
| 16               | 6                | 0              | 1.107742                | -1.827183 | 1.525564  |
| 17               | 6                | 0              | 1.378105                | -2.912262 | 0.801063  |
| 18               | 1                | 0              | 0.793060                | -1.901542 | 2.563354  |
| 19               | 1                | 0              | 1.277589                | -3.892089 | 1.254558  |
| 20               | 1                | 0              | 1.694495                | -2.869526 | -0.235194 |
| 21               | 46               | 0              | -0.741265               | 0.202171  | 0.136095  |
| 22               | 15               | 0              | -2.328997               | 0.981451  | -1.471658 |
| 23               | 1                | 0              | -3.406292               | 0.107821  | -1.803587 |
| 24               | 1                | 0              | -3.043051               | 2.174460  | -1.154976 |
| 25               | 1                | 0              | -1.837969               | 1.301547  | -2.768590 |
| 26               | 15               | 0              | -2.418390               | -0.052032 | 2.052750  |
| 27               | 1                | 0              | -3.371418               | 0.977772  | 2.327703  |
| 28               | 1                | 0              | -3.302181               | -1.175341 | 2.031686  |
| 29               | 1                | 0              | -1.890088               | -0.212759 | 3.371482  |

**TS A-to-B**

```

Zero-point correction=          0.221404 (Hartree/Particle)
Thermal correction to Energy=    0.238532
Thermal correction to Enthalpy=  0.239476
Thermal correction to Gibbs Free Energy= 0.175353
Sum of electronic and zero-point Energies= -546.559127
Sum of electronic and thermal Energies= -546.541999
Sum of electronic and thermal Enthalpies= -546.541054
Sum of electronic and thermal Free Energies= -546.605177
  
```

| Center Number | Atomic Number | Atomic Type | Coordinates (Angstroms) |           |           |
|---------------|---------------|-------------|-------------------------|-----------|-----------|
|               |               |             | X                       | Y         | Z         |
| 1             | 6             | 0           | 0.271396                | 0.420541  | -0.155966 |
| 2             | 6             | 0           | 0.060247                | 0.246491  | 1.204562  |
| 3             | 6             | 0           | 1.132309                | 0.038283  | 2.076147  |
| 4             | 6             | 0           | 2.441983                | 0.007430  | 1.603225  |
| 5             | 6             | 0           | 2.663156                | 0.194252  | 0.233785  |
| 6             | 6             | 0           | 1.591029                | 0.388363  | -0.636726 |
| 7             | 1             | 0           | -0.540799               | 0.567080  | -0.862078 |
| 8             | 1             | 0           | 3.275042                | -0.150196 | 2.282012  |
| 9             | 1             | 0           | 3.677652                | 0.180218  | -0.152168 |
| 10            | 1             | 0           | 1.770932                | 0.512805  | -1.700595 |
| 11            | 7             | 0           | 0.735175                | -0.127176 | 3.458034  |
| 12            | 6             | 0           | 1.540207                | 0.545731  | 4.486483  |
| 13            | 1             | 0           | 1.738626                | 1.571246  | 4.169844  |
| 14            | 1             | 0           | 0.978467                | 0.569491  | 5.424644  |
| 15            | 1             | 0           | 2.493699                | 0.031798  | 4.666861  |
| 16            | 6             | 0           | 0.147932                | -1.368594 | 3.824113  |
| 17            | 6             | 0           | -0.143168               | -2.409381 | 3.019184  |
| 18            | 1             | 0           | -0.089885               | -1.409895 | 4.885324  |
| 19            | 1             | 0           | -0.656428               | -3.268482 | 3.435280  |
| 20            | 1             | 0           | 0.140078                | -2.449214 | 1.974041  |
| 21            | 46            | 0           | -1.527578               | 0.197597  | 2.447461  |
| 22            | 15            | 0           | -2.863029               | 1.262912  | 0.815937  |
| 23            | 1             | 0           | -3.107919               | 0.529898  | -0.380479 |
| 24            | 1             | 0           | -4.186919               | 1.635139  | 1.188465  |
| 25            | 1             | 0           | -2.363154               | 2.490406  | 0.296357  |
| 26            | 15            | 0           | -3.275503               | 0.051561  | 4.312131  |
| 27            | 1             | 0           | -4.433392               | 0.890362  | 4.295292  |
| 28            | 1             | 0           | -3.914807               | -1.208000 | 4.526538  |
| 29            | 1             | 0           | -2.835158               | 0.314340  | 5.646500  |

forward...

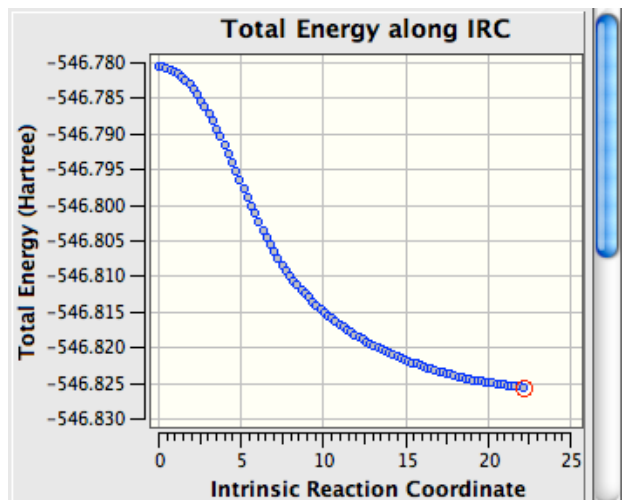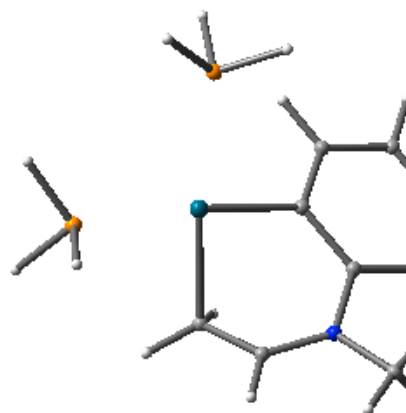

reverse...

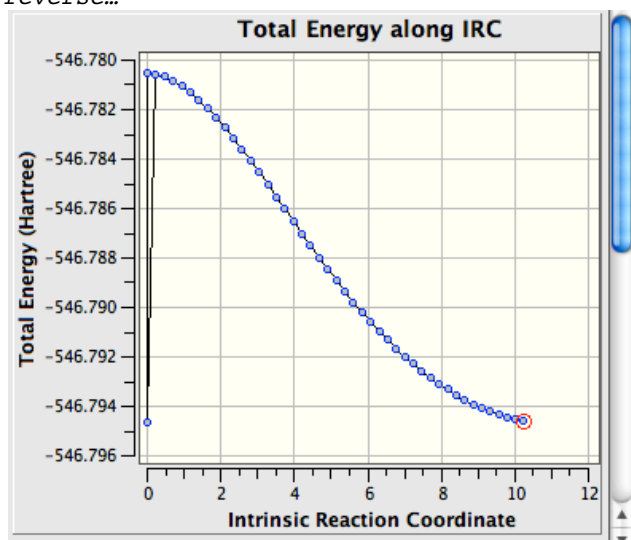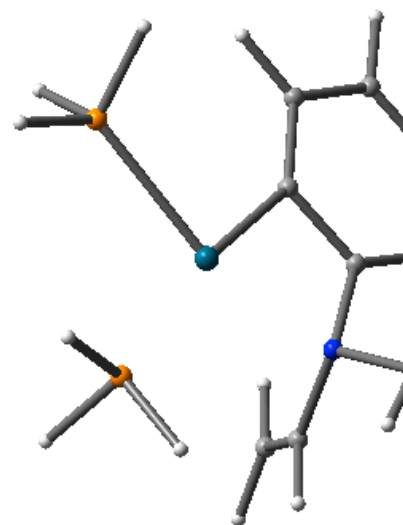



**B**

Zero-point correction= 0.223038 (Hartree/Particle)  
Thermal correction to Energy= 0.240353  
Thermal correction to Enthalpy= 0.241297  
Thermal correction to Gibbs Free Energy= 0.175888  
Sum of electronic and zero-point Energies= -546.602983  
Sum of electronic and thermal Energies= -546.585669  
Sum of electronic and thermal Enthalpies= -546.584724  
Sum of electronic and thermal Free Energies= -546.650134

| Center<br>Number | Atomic<br>Number | Atomic<br>Type | Coordinates (Angstroms) |           |           |
|------------------|------------------|----------------|-------------------------|-----------|-----------|
|                  |                  |                | X                       | Y         | Z         |
| 1                | 6                | 0              | 0.916850                | -0.126857 | -2.228876 |
| 2                | 6                | 0              | 0.888113                | -0.059034 | -0.833515 |
| 3                | 6                | 0              | 2.130858                | -0.055232 | -0.159309 |
| 4                | 6                | 0              | 3.341555                | -0.043655 | -0.862567 |
| 5                | 6                | 0              | 3.336629                | -0.056045 | -2.256371 |
| 6                | 6                | 0              | 2.124130                | -0.107264 | -2.940060 |
| 7                | 1                | 0              | -0.012087               | -0.179494 | -2.789544 |
| 8                | 1                | 0              | 4.286810                | -0.062598 | -0.329238 |
| 9                | 1                | 0              | 4.276820                | -0.046379 | -2.798327 |
| 10               | 1                | 0              | 2.108759                | -0.122872 | -4.026017 |
| 11               | 7                | 0              | 2.151663                | -0.069726 | 1.273879  |
| 12               | 6                | 0              | 3.161638                | 0.723787  | 1.988357  |
| 13               | 1                | 0              | 3.205345                | 1.727858  | 1.559793  |
| 14               | 1                | 0              | 2.891192                | 0.782908  | 3.043874  |
| 15               | 1                | 0              | 4.145987                | 0.254275  | 1.907000  |
| 16               | 6                | 0              | 1.208128                | -0.728355 | 1.925090  |
| 17               | 6                | 0              | 0.241057                | -1.586213 | 1.319101  |
| 18               | 1                | 0              | 1.186585                | -0.560553 | 2.999970  |
| 19               | 1                | 0              | -0.368722               | -2.125477 | 2.040030  |
| 20               | 1                | 0              | 0.615491                | -2.222586 | 0.514920  |
| 21               | 46               | 0              | -0.882791               | -0.154648 | 0.207126  |
| 22               | 15               | 0              | -1.812204               | 1.710218  | -1.159780 |
| 23               | 1                | 0              | -1.911289               | 1.528429  | -2.573428 |
| 24               | 1                | 0              | -3.105491               | 2.267898  | -0.908701 |
| 25               | 1                | 0              | -1.036778               | 2.908336  | -1.134684 |
| 26               | 15               | 0              | -3.014372               | -0.529271 | 1.508650  |
| 27               | 1                | 0              | -3.840395               | 0.566540  | 1.914189  |
| 28               | 1                | 0              | -4.015059               | -1.337919 | 0.883821  |
| 29               | 1                | 0              | -2.930909               | -1.214845 | 2.760960  |

**TS B-to-C**

Zero-point correction= 0.219965 (Hartree/Particle)  
 Thermal correction to Energy= 0.237631  
 Thermal correction to Enthalpy= 0.238575  
 Thermal correction to Gibbs Free Energy= 0.172162  
 Sum of electronic and zero-point Energies= -546.552903  
 Sum of electronic and thermal Energies= -546.535237  
 Sum of electronic and thermal Enthalpies= -546.534293  
 Sum of electronic and thermal Free Energies= -546.600706

| Center Number | Atomic Number | Atomic Type | Coordinates (Angstroms) |           |           |
|---------------|---------------|-------------|-------------------------|-----------|-----------|
|               |               |             | X                       | Y         | Z         |
| 1             | 6             | 0           | -0.004728               | 0.217748  | 0.076949  |
| 2             | 6             | 0           | 0.016494                | 0.147832  | 1.465108  |
| 3             | 6             | 0           | 1.259407                | 0.055187  | 2.137118  |
| 4             | 6             | 0           | 2.460728                | 0.157909  | 1.449848  |
| 5             | 6             | 0           | 2.424651                | 0.329551  | 0.057777  |
| 6             | 6             | 0           | 1.208830                | 0.344851  | -0.621567 |
| 7             | 1             | 0           | -0.943748               | 0.213296  | -0.466572 |
| 8             | 1             | 0           | 3.410871                | 0.071422  | 1.967657  |
| 9             | 1             | 0           | 3.356089                | 0.419578  | -0.491731 |
| 10            | 1             | 0           | 1.191043                | 0.464998  | -1.700560 |
| 11            | 7             | 0           | 1.129428                | -0.225809 | 3.530320  |
| 12            | 6             | 0           | 2.117354                | 0.213429  | 4.509446  |
| 13            | 1             | 0           | 2.288749                | 1.292929  | 4.424558  |
| 14            | 1             | 0           | 1.757283                | -0.024915 | 5.511882  |
| 15            | 1             | 0           | 3.063063                | -0.312421 | 4.351807  |
| 16            | 6             | 0           | -0.143774               | -0.544702 | 3.832804  |
| 17            | 6             | 0           | -0.955522               | -1.002119 | 2.738049  |
| 18            | 1             | 0           | -0.449187               | -0.575733 | 4.872267  |
| 19            | 1             | 0           | -2.018667               | -1.143593 | 2.947522  |
| 20            | 1             | 0           | -0.581235               | -1.824162 | 2.128474  |
| 21            | 46            | 0           | -1.473961               | 1.194465  | 2.652277  |
| 22            | 15            | 0           | -2.712071               | 2.594768  | 0.851088  |
| 23            | 1             | 0           | -2.015259               | 3.715249  | 0.289920  |
| 24            | 1             | 0           | -3.069500               | 1.958763  | -0.384075 |
| 25            | 1             | 0           | -3.965265               | 3.250937  | 1.091608  |
| 26            | 15            | 0           | -2.245633               | 2.494482  | 4.636960  |
| 27            | 1             | 0           | -1.741181               | 3.827213  | 4.773123  |
| 28            | 1             | 0           | -3.642754               | 2.794460  | 4.720796  |
| 29            | 1             | 0           | -2.054581               | 2.069725  | 5.992579  |

forward...

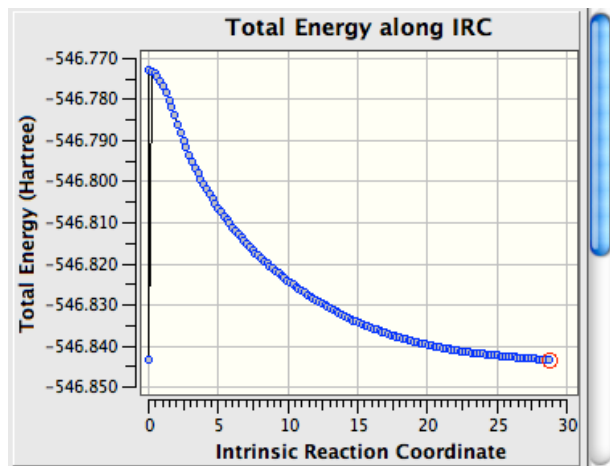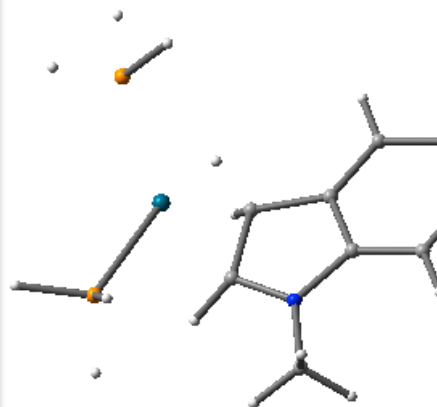

reverse...

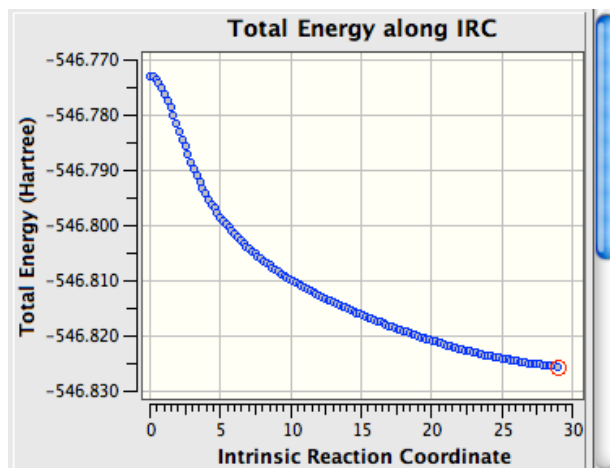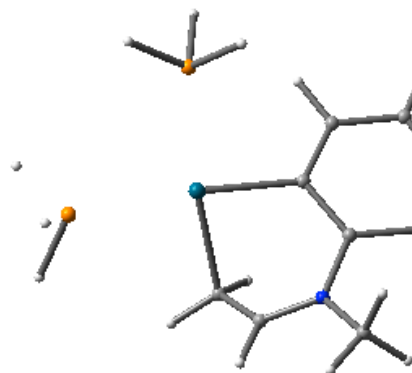

**TS B-to-B'**

Zero-point correction= 0.222711 (Hartree/Particle)  
 Thermal correction to Energy= 0.239064  
 Thermal correction to Enthalpy= 0.240009  
 Thermal correction to Gibbs Free Energy= 0.177939  
 Sum of electronic and zero-point Energies= -546.578927  
 Sum of electronic and thermal Energies= -546.562573  
 Sum of electronic and thermal Enthalpies= -546.561629  
 Sum of electronic and thermal Free Energies= -546.623699

| Center<br>Number | Atomic<br>Number | Atomic<br>Type | Coordinates (Angstroms) |           |           |
|------------------|------------------|----------------|-------------------------|-----------|-----------|
|                  |                  |                | X                       | Y         | Z         |
| 1                | 6                | 0              | 1.078818                | 0.773423  | -1.970104 |
| 2                | 6                | 0              | 0.988493                | 0.178155  | -0.696624 |
| 3                | 6                | 0              | 2.203722                | 0.119390  | 0.023953  |
| 4                | 6                | 0              | 3.379780                | 0.730059  | -0.457621 |
| 5                | 6                | 0              | 3.400841                | 1.348938  | -1.699100 |
| 6                | 6                | 0              | 2.247201                | 1.338982  | -2.477974 |
| 7                | 1                | 0              | 0.211623                | 0.780999  | -2.618475 |
| 8                | 1                | 0              | 4.293029                | 0.732736  | 0.120795  |
| 9                | 1                | 0              | 4.314426                | 1.813998  | -2.054744 |
| 10               | 1                | 0              | 2.248309                | 1.774309  | -3.473073 |
| 11               | 7                | 0              | 2.334222                | -0.643823 | 1.248180  |
| 12               | 6                | 0              | 3.682234                | -0.749327 | 1.863846  |
| 13               | 1                | 0              | 4.018857                | 0.240492  | 2.176232  |
| 14               | 1                | 0              | 3.622595                | -1.396210 | 2.737222  |
| 15               | 1                | 0              | 4.382933                | -1.172787 | 1.143304  |
| 16               | 6                | 0              | 1.374366                | -1.315021 | 1.817175  |
| 17               | 6                | 0              | -0.045372               | -1.331494 | 1.499336  |
| 18               | 1                | 0              | 1.697122                | -1.919315 | 2.664148  |
| 19               | 1                | 0              | -0.389203               | -2.369416 | 1.602390  |
| 20               | 46               | 0              | -0.880776               | -0.417779 | -0.115769 |
| 21               | 15               | 0              | -2.209433               | 1.061361  | -1.757807 |
| 22               | 1                | 0              | -2.301558               | 0.774614  | -3.158183 |
| 23               | 1                | 0              | -3.602291               | 1.273711  | -1.501467 |
| 24               | 1                | 0              | -1.800915               | 2.428540  | -1.840780 |
| 25               | 15               | 0              | -3.121193               | -1.423446 | 0.594560  |
| 26               | 1                | 0              | -3.123305               | -2.288945 | 1.734627  |
| 27               | 1                | 0              | -4.245699               | -0.607849 | 0.941838  |
| 28               | 1                | 0              | -3.767453               | -2.294816 | -0.338168 |
| 29               | 1                | 0              | -0.531503               | -0.776281 | 2.324492  |

forward...

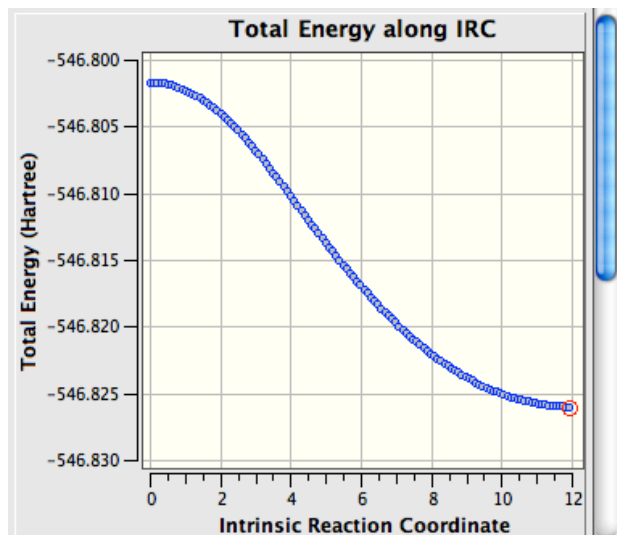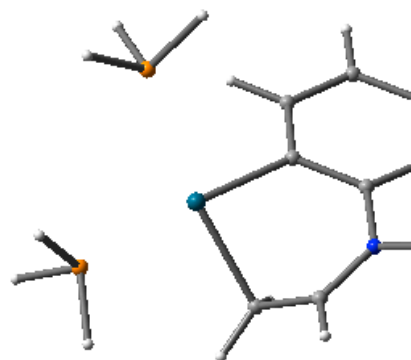

reverse...

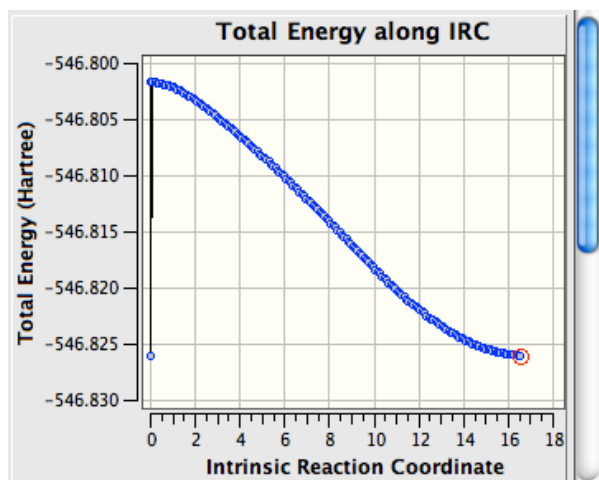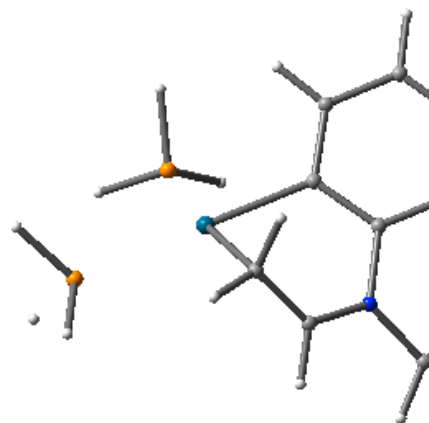

c

Zero-point correction= 0.221699 (Hartree/Particle)  
Thermal correction to Energy= 0.239348  
Thermal correction to Enthalpy= 0.240292  
Thermal correction to Gibbs Free Energy= 0.171933  
Sum of electronic and zero-point Energies= -546.622016  
Sum of electronic and thermal Energies= -546.604367  
Sum of electronic and thermal Enthalpies= -546.603423  
Sum of electronic and thermal Free Energies= -546.671782

| Center<br>Number | Atomic<br>Number | Atomic<br>Type | Coordinates (Angstroms) |           |           |
|------------------|------------------|----------------|-------------------------|-----------|-----------|
|                  |                  |                | X                       | Y         | Z         |
| 1                | 6                | 0              | 0.109357                | 0.025020  | -0.049290 |
| 2                | 6                | 0              | 0.059559                | 0.037785  | 1.340843  |
| 3                | 6                | 0              | 1.246656                | -0.030019 | 2.089007  |
| 4                | 6                | 0              | 2.502241                | -0.104316 | 1.485899  |
| 5                | 6                | 0              | 2.535125                | -0.130154 | 0.090442  |
| 6                | 6                | 0              | 1.358307                | -0.070446 | -0.669727 |
| 7                | 1                | 0              | -0.799331               | 0.076827  | -0.642396 |
| 8                | 1                | 0              | 3.418641                | -0.140841 | 2.065536  |
| 9                | 1                | 0              | 3.493923                | -0.197082 | -0.414312 |
| 10               | 1                | 0              | 1.418823                | -0.098685 | -1.752933 |
| 11               | 7                | 0              | 0.927096                | -0.034743 | 3.458195  |
| 12               | 6                | 0              | 1.901481                | -0.211031 | 4.522094  |
| 13               | 1                | 0              | 2.457980                | 0.716531  | 4.701838  |
| 14               | 1                | 0              | 1.385399                | -0.504856 | 5.438548  |
| 15               | 1                | 0              | 2.606154                | -1.000684 | 4.248187  |
| 16               | 6                | 0              | -0.416875               | 0.138819  | 3.652524  |
| 17               | 6                | 0              | -1.084780               | 0.166596  | 2.300419  |
| 18               | 1                | 0              | -0.859820               | -0.335737 | 4.524631  |
| 19               | 1                | 0              | -1.604470               | 1.184803  | 2.147365  |
| 20               | 1                | 0              | -1.911568               | -0.544179 | 2.201910  |
| 21               | 46               | 0              | -1.159660               | 2.188236  | 3.817615  |
| 22               | 15               | 0              | -2.275152               | 4.332227  | 3.058012  |
| 23               | 1                | 0              | -1.621076               | 5.126626  | 2.063119  |
| 24               | 1                | 0              | -3.576689               | 4.285404  | 2.464080  |
| 25               | 1                | 0              | -2.527517               | 5.369288  | 4.011597  |
| 26               | 15               | 0              | -0.454499               | 2.628113  | 6.128222  |
| 27               | 1                | 0              | 0.644256                | 3.519861  | 6.341754  |
| 28               | 1                | 0              | -1.426543               | 3.288375  | 6.942981  |
| 29               | 1                | 0              | -0.074490               | 1.600754  | 7.053371  |

**TS C-to-D**

Zero-point correction= 0.218606 (Hartree/Particle)  
 Thermal correction to Energy= 0.235799  
 Thermal correction to Enthalpy= 0.236743  
 Thermal correction to Gibbs Free Energy= 0.170978  
 Sum of electronic and zero-point Energies= -546.610559  
 Sum of electronic and thermal Energies= -546.593366  
 Sum of electronic and thermal Enthalpies= -546.592422  
 Sum of electronic and thermal Free Energies= -546.658187

| Center<br>Number | Atomic<br>Number | Atomic<br>Type | Coordinates (Angstroms) |           |           |
|------------------|------------------|----------------|-------------------------|-----------|-----------|
|                  |                  |                | X                       | Y         | Z         |
| 1                | 6                | 0              | -0.021684               | -0.106063 | 0.028390  |
| 2                | 6                | 0              | 0.041120                | -0.093915 | 1.431048  |
| 3                | 6                | 0              | 1.296690                | -0.009256 | 2.082096  |
| 4                | 6                | 0              | 2.494930                | 0.097171  | 1.365131  |
| 5                | 6                | 0              | 2.405663                | 0.079203  | -0.022066 |
| 6                | 6                | 0              | 1.164917                | -0.028093 | -0.686268 |
| 7                | 1                | 0              | -0.976993               | -0.178010 | -0.483441 |
| 8                | 1                | 0              | 3.456032                | 0.180504  | 1.861811  |
| 9                | 1                | 0              | 3.315857                | 0.146468  | -0.610325 |
| 10               | 1                | 0              | 1.143542                | -0.046172 | -1.771176 |
| 11               | 7                | 0              | 1.093400                | -0.062811 | 3.455561  |
| 12               | 6                | 0              | 2.145538                | -0.018929 | 4.457720  |
| 13               | 1                | 0              | 2.564614                | 0.989741  | 4.553966  |
| 14               | 1                | 0              | 1.737740                | -0.332956 | 5.421033  |
| 15               | 1                | 0              | 2.947006                | -0.710179 | 4.182839  |
| 16               | 6                | 0              | -0.262004               | -0.128478 | 3.714211  |
| 17               | 6                | 0              | -0.962191               | -0.157797 | 2.467942  |
| 18               | 1                | 0              | -0.607563               | -0.552865 | 4.649230  |
| 19               | 1                | 0              | -1.681263               | 1.580095  | 2.358887  |
| 20               | 1                | 0              | -1.971278               | -0.533888 | 2.357650  |
| 21               | 46               | 0              | -1.296925               | 1.949364  | 3.835481  |
| 22               | 15               | 0              | -2.470745               | 4.029149  | 3.371487  |
| 23               | 1                | 0              | -1.969231               | 4.823742  | 2.298686  |
| 24               | 1                | 0              | -3.835207               | 3.910669  | 2.973986  |
| 25               | 1                | 0              | -2.598746               | 5.033290  | 4.380009  |
| 26               | 15               | 0              | -0.670792               | 2.351362  | 6.266001  |
| 27               | 1                | 0              | -0.393633               | 1.263207  | 7.154374  |
| 28               | 1                | 0              | 0.475342                | 3.157276  | 6.556710  |
| 29               | 1                | 0              | -1.624043               | 3.041213  | 7.078970  |

forward...

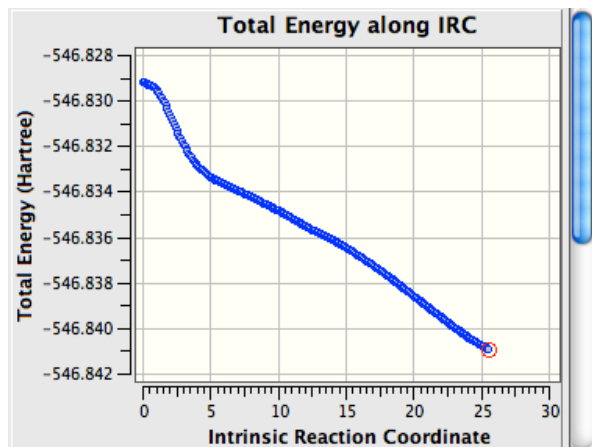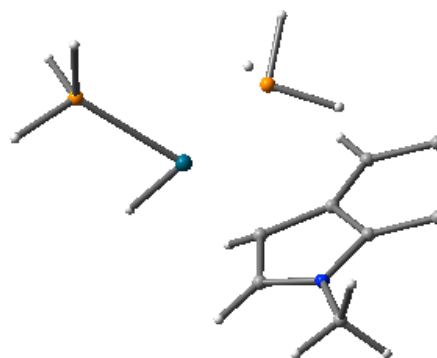

reverse...

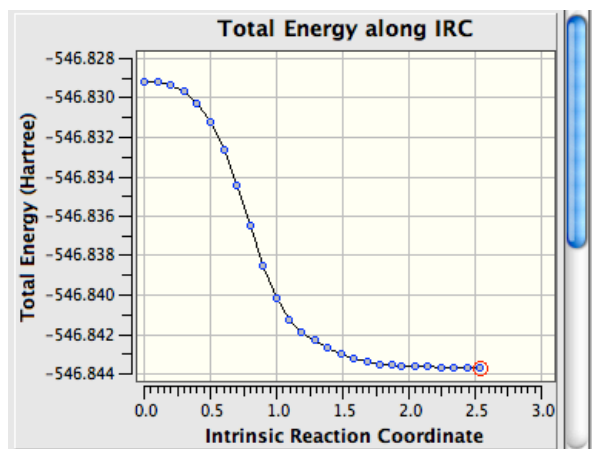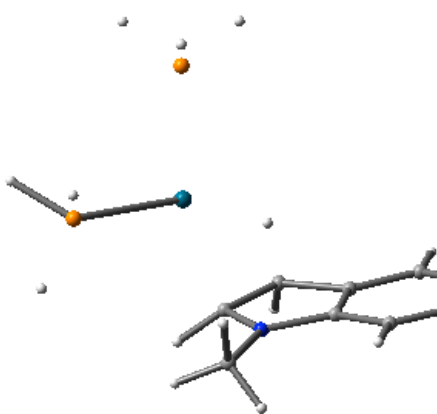



**D (complexed to HPd(PH<sub>3</sub>)<sub>2</sub>⁺)**

Zero-point correction= 0.220723 (Hartree/Particle)  
Thermal correction to Energy= 0.237958  
Thermal correction to Enthalpy= 0.238903  
Thermal correction to Gibbs Free Energy= 0.173356  
Sum of electronic and zero-point Energies= -546.620951  
Sum of electronic and thermal Energies= -546.603716  
Sum of electronic and thermal Enthalpies= -546.602771  
Sum of electronic and thermal Free Energies= -546.668318

| Center Number | Atomic Number | Atomic Type | Coordinates (Angstroms) |           |           |
|---------------|---------------|-------------|-------------------------|-----------|-----------|
|               |               |             | X                       | Y         | Z         |
| 1             | 6             | 0           | 0.540197                | -0.114414 | -2.501382 |
| 2             | 6             | 0           | 0.192086                | -0.691974 | -1.272963 |
| 3             | 6             | 0           | 1.216019                | -1.063563 | -0.370662 |
| 4             | 6             | 0           | 2.570450                | -0.848296 | -0.634299 |
| 5             | 6             | 0           | 2.890018                | -0.265843 | -1.859478 |
| 6             | 6             | 0           | 1.889147                | 0.090351  | -2.782882 |
| 7             | 1             | 0           | -0.224898               | 0.160567  | -3.221896 |
| 8             | 1             | 0           | 3.346315                | -1.134844 | 0.068541  |
| 9             | 1             | 0           | 3.932195                | -0.093893 | -2.109866 |
| 10            | 1             | 0           | 2.177068                | 0.526673  | -3.734400 |
| 11            | 7             | 0           | 0.613671                | -1.665693 | 0.745587  |
| 12            | 6             | 0           | 1.337108                | -2.174502 | 1.905903  |
| 13            | 1             | 0           | 1.835145                | -1.357057 | 2.436809  |
| 14            | 1             | 0           | 0.632432                | -2.663088 | 2.580404  |
| 15            | 1             | 0           | 2.086191                | -2.903189 | 1.583764  |
| 16            | 6             | 0           | -0.722857               | -1.687064 | 0.571212  |
| 17            | 6             | 0           | -1.080371               | -1.047317 | -0.645163 |
| 18            | 1             | 0           | -1.361756               | -2.206841 | 1.272237  |
| 19            | 1             | 0           | -3.191848               | -0.346965 | 0.643437  |
| 20            | 1             | 0           | -1.971505               | -1.320001 | -1.202003 |
| 21            | 46            | 0           | -2.004091               | 0.651847  | 0.503758  |
| 22            | 15            | 0           | -3.604757               | 2.098424  | 1.600911  |
| 23            | 1             | 0           | -4.820430               | 2.324731  | 0.892901  |
| 24            | 1             | 0           | -4.116083               | 1.640446  | 2.849568  |
| 25            | 1             | 0           | -3.254823               | 3.439730  | 1.945331  |
| 26            | 15            | 0           | -0.110024               | 2.331472  | 0.253780  |
| 27            | 1             | 0           | -0.097345               | 3.535957  | 1.025663  |
| 28            | 1             | 0           | 1.225410                | 1.888527  | 0.499671  |
| 29            | 1             | 0           | 0.077338                | 2.895820  | -1.044483 |

## E

```

Zero-point correction=          0.209235 (Hartree/Particle)
Thermal correction to Energy=    0.226441
Thermal correction to Enthalpy=   0.227385
Thermal correction to Gibbs Free Energy= 0.162939
Sum of electronic and zero-point Energies= -546.179244
Sum of electronic and thermal Energies= -546.162038
Sum of electronic and thermal Enthalpies= -546.161094
Sum of electronic and thermal Free Energies= -546.225540

```

| Center<br>Number | Atomic<br>Number | Atomic<br>Type | Coordinates (Angstroms) |           |           |
|------------------|------------------|----------------|-------------------------|-----------|-----------|
|                  |                  |                | X                       | Y         | Z         |
| 1                | 6                | 0              | -1.671669               | 1.316688  | -1.299730 |
| 2                | 6                | 0              | -0.570442               | 1.129813  | -0.444832 |
| 3                | 6                | 0              | -0.311364               | 2.147843  | 0.508215  |
| 4                | 6                | 0              | -1.225555               | 3.219073  | 0.647223  |
| 5                | 6                | 0              | -2.330815               | 3.339707  | -0.187303 |
| 6                | 6                | 0              | -2.548376               | 2.397711  | -1.190917 |
| 7                | 1                | 0              | -1.853119               | 0.598357  | -2.095810 |
| 8                | 1                | 0              | -1.059336               | 3.986463  | 1.394343  |
| 9                | 1                | 0              | -3.005652               | 4.182866  | -0.061294 |
| 10               | 1                | 0              | -3.387319               | 2.494677  | -1.875637 |
| 11               | 7                | 0              | 0.851094                | 2.143331  | 1.289731  |
| 12               | 6                | 0              | 1.033236                | 3.148914  | 2.322468  |
| 13               | 1                | 0              | 0.199592                | 3.132846  | 3.034058  |
| 14               | 1                | 0              | 1.948187                | 2.927141  | 2.874929  |
| 15               | 1                | 0              | 1.114497                | 4.166612  | 1.911710  |
| 16               | 6                | 0              | 1.952097                | 1.371112  | 0.930138  |
| 17               | 6                | 0              | 1.974777                | 0.328954  | 0.085660  |
| 18               | 1                | 0              | 2.872461                | 1.708668  | 1.406538  |
| 19               | 1                | 0              | 2.954329                | -0.100540 | -0.122506 |
| 20               | 15               | 0              | -1.763305               | -1.981959 | -1.080185 |
| 21               | 1                | 0              | -2.442524               | -2.024713 | -2.349271 |
| 22               | 1                | 0              | -1.851746               | -3.391068 | -0.800518 |
| 23               | 1                | 0              | -2.885297               | -1.569555 | -0.291523 |
| 24               | 15               | 0              | 1.816410                | -2.741982 | -0.862806 |
| 25               | 1                | 0              | 3.227427                | -2.525768 | -0.720514 |
| 26               | 1                | 0              | 1.708635                | -3.838478 | 0.062148  |
| 27               | 1                | 0              | 1.871632                | -3.538520 | -2.060408 |
| 28               | 46               | 0              | 0.397679                | -0.657777 | -0.615270 |

**TS E-to-D**

Zero-point correction= 0.206974 (Hartree/Particle)  
Thermal correction to Energy= 0.224201  
Thermal correction to Enthalpy= 0.225145  
Thermal correction to Gibbs Free Energy= 0.159767  
Sum of electronic and zero-point Energies= -546.167837  
Sum of electronic and thermal Energies= -546.150610  
Sum of electronic and thermal Enthalpies= -546.149665  
Sum of electronic and thermal Free Energies= -546.215044

| Center Number | Atomic Number | Atomic Type | Coordinates (Angstroms) |           |           |
|---------------|---------------|-------------|-------------------------|-----------|-----------|
|               |               |             | X                       | Y         | Z         |
| 1             | 6             | 0           | 1.271779                | 1.509569  | -1.187380 |
| 2             | 6             | 0           | 0.977424                | 0.274297  | -0.574789 |
| 3             | 6             | 0           | 2.011071                | -0.345533 | 0.178858  |
| 4             | 6             | 0           | 3.198303                | 0.347992  | 0.476192  |
| 5             | 6             | 0           | 3.421699                | 1.605236  | -0.077963 |
| 6             | 6             | 0           | 2.476933                | 2.170107  | -0.943958 |
| 7             | 1             | 0           | 0.534048                | 1.975370  | -1.835911 |
| 8             | 1             | 0           | 3.963457                | -0.111569 | 1.094950  |
| 9             | 1             | 0           | 4.350708                | 2.127572  | 0.135735  |
| 10            | 1             | 0           | 2.670746                | 3.132623  | -1.411652 |
| 11            | 7             | 0           | 1.837839                | -1.699221 | 0.452310  |
| 12            | 6             | 0           | 2.856528                | -2.480319 | 1.124574  |
| 13            | 1             | 0           | 3.043256                | -2.091880 | 2.132188  |
| 14            | 1             | 0           | 2.506464                | -3.510448 | 1.221121  |
| 15            | 1             | 0           | 3.809012                | -2.481782 | 0.573742  |
| 16            | 6             | 0           | 0.882440                | -2.301824 | -0.357974 |
| 17            | 6             | 0           | -0.031122               | -1.542722 | -1.007353 |
| 18            | 1             | 0           | 1.017550                | -3.368957 | -0.524587 |
| 19            | 1             | 0           | -0.582998               | -1.978899 | -1.839797 |
| 20            | 46            | 0           | -1.032499               | 0.009090  | -0.146318 |
| 21            | 15            | 0           | -1.496507               | 2.229948  | 0.999796  |
| 22            | 1             | 0           | -1.433565               | 3.413183  | 0.183504  |
| 23            | 1             | 0           | -2.638111               | 2.641899  | 1.782652  |
| 24            | 1             | 0           | -0.496080               | 2.634642  | 1.947599  |
| 25            | 15            | 0           | -3.344742               | -1.031647 | -0.042771 |
| 26            | 1             | 0           | -3.580685               | -2.089149 | -0.990063 |
| 27            | 1             | 0           | -3.662682               | -1.800896 | 1.131950  |
| 28            | 1             | 0           | -4.642640               | -0.410640 | -0.173578 |

forward...

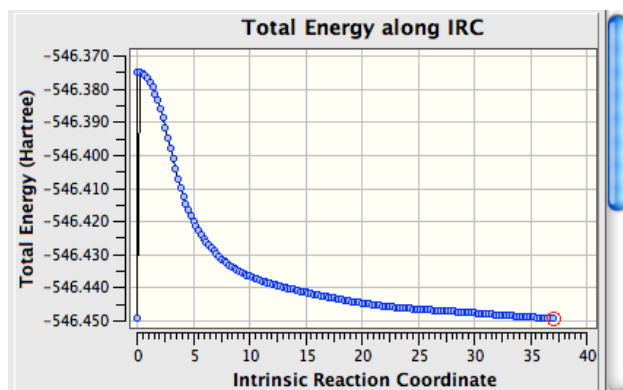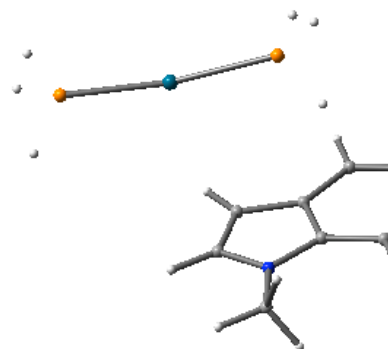

**System with two PMe<sub>3</sub> ligands:**

**A**

```

Zero-point correction=          0.402030 (Hartree/Particle)
Thermal correction to Energy=    0.428743
Thermal correction to Enthalpy=  0.429687
Thermal correction to Gibbs Free Energy= 0.345915
Sum of electronic and zero-point Energies= -782.347902
Sum of electronic and thermal Energies= -782.321189
Sum of electronic and thermal Enthalpies= -782.320245
Sum of electronic and thermal Free Energies= -782.404017
    
```

| Center Number | Atomic Number | Atomic Type | Coordinates (Angstroms) |           |           |
|---------------|---------------|-------------|-------------------------|-----------|-----------|
|               |               |             | X                       | Y         | Z         |
| 1             | 6             | 0           | 1.306303                | 0.526869  | -2.445582 |
| 2             | 6             | 0           | 0.869268                | 0.257480  | -1.148376 |
| 3             | 6             | 0           | 1.773274                | -0.279237 | -0.240006 |
| 4             | 6             | 0           | 3.099832                | -0.569577 | -0.545546 |
| 5             | 6             | 0           | 3.526537                | -0.295370 | -1.848106 |
| 6             | 6             | 0           | 2.638059                | 0.246449  | -2.782199 |
| 7             | 1             | 0           | 0.655258                | 0.947923  | -3.200942 |
| 8             | 1             | 0           | 3.776296                | -0.996100 | 0.189434  |
| 9             | 1             | 0           | 4.552990                | -0.503400 | -2.134392 |
| 10            | 1             | 0           | 2.985540                | 0.456684  | -3.790162 |
| 11            | 7             | 0           | 1.130539                | -0.441754 | 1.078413  |
| 12            | 6             | 0           | 1.697152                | 0.490579  | 2.091288  |
| 13            | 1             | 0           | 1.685753                | 1.502560  | 1.685693  |
| 14            | 1             | 0           | 1.090507                | 0.458127  | 2.999053  |
| 15            | 1             | 0           | 2.727692                | 0.210383  | 2.339447  |
| 16            | 6             | 0           | 1.024712                | -1.787742 | 1.577490  |
| 17            | 6             | 0           | 1.189439                | -2.911570 | 0.878769  |
| 18            | 1             | 0           | 0.766905                | -1.817041 | 2.633075  |
| 19            | 1             | 0           | 1.058011                | -3.869183 | 1.370379  |
| 20            | 1             | 0           | 1.455183                | -2.918428 | -0.172471 |
| 21            | 46            | 0           | -0.749154               | 0.298199  | 0.073650  |
| 22            | 15            | 0           | -2.351172               | 1.164312  | -1.480143 |
| 23            | 15            | 0           | -2.428549               | -0.064857 | 1.976548  |
| 24            | 6             | 0           | -1.715603               | 0.070874  | 3.718364  |
| 25            | 1             | 0           | -0.887412               | -0.630435 | 3.841113  |
| 26            | 1             | 0           | -1.353183               | 1.087397  | 3.892579  |
| 27            | 1             | 0           | -2.488929               | -0.166051 | 4.455696  |
| 28            | 6             | 0           | -3.057715               | -1.841518 | 1.945047  |
| 29            | 1             | 0           | -3.651041               | -2.006168 | 1.041878  |
| 30            | 1             | 0           | -2.202509               | -2.521882 | 1.923977  |
| 31            | 1             | 0           | -3.673046               | -2.050959 | 2.825528  |
| 32            | 6             | 0           | -4.019312               | 0.926065  | 2.197734  |
| 33            | 1             | 0           | -3.775230               | 1.974774  | 2.387870  |
| 34            | 1             | 0           | -4.646236               | 0.861172  | 1.305592  |
| 35            | 1             | 0           | -4.581711               | 0.533443  | 3.050564  |
| 36            | 6             | 0           | -3.852884               | 0.055049  | -1.704626 |
| 37            | 1             | 0           | -4.348961               | -0.119673 | -0.748172 |
| 38            | 1             | 0           | -4.560344               | 0.524800  | -2.395114 |
| 39            | 1             | 0           | -3.529896               | -0.904909 | -2.115612 |
| 40            | 6             | 0           | -3.053714               | 2.820675  | -0.939334 |
| 41            | 1             | 0           | -3.816733               | 3.151425  | -1.650937 |
| 42            | 1             | 0           | -3.495279               | 2.739478  | 0.054907  |
| 43            | 1             | 0           | -2.245141               | 3.555543  | -0.907800 |
| 44            | 6             | 0           | -1.878687               | 1.511658  | -3.261207 |
| 45            | 1             | 0           | -1.097953               | 2.274051  | -3.299158 |
| 46            | 1             | 0           | -1.522726               | 0.597698  | -3.741079 |
| 47            | 1             | 0           | -2.763347               | 1.877352  | -3.792102 |

**TS A-to-B**

Zero-point correction= 0.401250 (Hartree/Particle)  
 Thermal correction to Energy= 0.427535  
 Thermal correction to Enthalpy= 0.428480  
 Thermal correction to Gibbs Free Energy= 0.345007  
 Sum of electronic and zero-point Energies= -782.338031  
 Sum of electronic and thermal Energies= -782.311746  
 Sum of electronic and thermal Enthalpies= -782.310802  
 Sum of electronic and thermal Free Energies= -782.394274

| Center Number | Atomic Number | Atomic Type | Coordinates (Angstroms) |           |           |
|---------------|---------------|-------------|-------------------------|-----------|-----------|
|               |               |             | X                       | Y         | Z         |
| 1             | 6             | 0           | 0.313281                | 0.249836  | -0.139735 |
| 2             | 6             | 0           | 0.053883                | 0.284551  | 1.228665  |
| 3             | 6             | 0           | 1.128353                | 0.280354  | 2.126012  |
| 4             | 6             | 0           | 2.450169                | 0.269750  | 1.681854  |
| 5             | 6             | 0           | 2.701841                | 0.264100  | 0.306939  |
| 6             | 6             | 0           | 1.639972                | 0.239183  | -0.596403 |
| 7             | 1             | 0           | -0.483637               | 0.221105  | -0.875835 |
| 8             | 1             | 0           | 3.271694                | 0.264651  | 2.392569  |
| 9             | 1             | 0           | 3.725552                | 0.264326  | -0.054621 |
| 10            | 1             | 0           | 1.836129                | 0.207811  | -1.664542 |
| 11            | 7             | 0           | 0.749084                | 0.247221  | 3.522153  |
| 12            | 6             | 0           | 1.463304                | 1.142310  | 4.440618  |
| 13            | 1             | 0           | 1.504258                | 2.142345  | 4.004573  |
| 14            | 1             | 0           | 0.919957                | 1.195455  | 5.388734  |
| 15            | 1             | 0           | 2.486072                | 0.800201  | 4.649827  |
| 16            | 6             | 0           | 0.350751                | -1.005236 | 4.044683  |
| 17            | 6             | 0           | 0.154002                | -2.155897 | 3.372382  |
| 18            | 1             | 0           | 0.169277                | -0.961937 | 5.115862  |
| 19            | 1             | 0           | -0.212672               | -3.023152 | 3.909668  |
| 20            | 1             | 0           | 0.378674                | -2.275706 | 2.319211  |
| 21            | 46            | 0           | -1.578556               | 0.238228  | 2.442068  |
| 22            | 15            | 0           | -2.915755               | 1.164559  | 0.722895  |
| 23            | 15            | 0           | -3.343446               | -0.051411 | 4.275737  |
| 24            | 6             | 0           | -4.240513               | 1.451563  | 4.977077  |
| 25            | 1             | 0           | -3.504943               | 2.171417  | 5.346168  |
| 26            | 1             | 0           | -4.842802               | 1.931140  | 4.202927  |
| 27            | 1             | 0           | -4.894770               | 1.150708  | 5.801297  |
| 28            | 6             | 0           | -4.751876               | -1.231076 | 3.854225  |
| 29            | 1             | 0           | -5.337169               | -0.842716 | 3.017265  |
| 30            | 1             | 0           | -4.333508               | -2.199451 | 3.567190  |
| 31            | 1             | 0           | -5.410897               | -1.363327 | 4.717852  |
| 32            | 6             | 0           | -2.673702               | -0.838652 | 5.853398  |
| 33            | 1             | 0           | -2.207239               | -1.796621 | 5.614061  |
| 34            | 1             | 0           | -1.929740               | -0.180018 | 6.308884  |
| 35            | 1             | 0           | -3.490930               | -0.998804 | 6.563307  |
| 36            | 6             | 0           | -4.586308               | 1.831085  | 1.260498  |
| 37            | 1             | 0           | -5.102040               | 2.241479  | 0.386463  |
| 38            | 1             | 0           | -5.196844               | 1.033843  | 1.688759  |
| 39            | 1             | 0           | -4.447876               | 2.624193  | 1.998266  |
| 40            | 6             | 0           | -3.381187               | -0.053857 | -0.627305 |
| 41            | 1             | 0           | -3.940487               | 0.462336  | -1.413887 |
| 42            | 1             | 0           | -2.488060               | -0.513341 | -1.053164 |
| 43            | 1             | 0           | -4.003924               | -0.839663 | -0.192180 |
| 44            | 6             | 0           | -2.175428               | 2.654845  | -0.144185 |
| 45            | 1             | 0           | -2.845678               | 2.982390  | -0.945027 |
| 46            | 1             | 0           | -2.059383               | 3.459196  | 0.586822  |
| 47            | 1             | 0           | -1.195809               | 2.407241  | -0.552485 |

**B**

```

Zero-point correction=          0.402446 (Hartree/Particle)
Thermal correction to Energy=      0.428982
Thermal correction to Enthalpy=    0.429926
Thermal correction to Gibbs Free Energy= 0.345956
Sum of electronic and zero-point Energies= -782.375349
Sum of electronic and thermal Energies= -782.348813
Sum of electronic and thermal Enthalpies= -782.347868
Sum of electronic and thermal Free Energies= -782.431838

```

| Center<br>Number | Atomic<br>Number | Atomic<br>Type | Coordinates (Angstroms) |           |           |
|------------------|------------------|----------------|-------------------------|-----------|-----------|
|                  |                  |                | X                       | Y         | Z         |
| 1                | 6                | 0              | 1.087359                | -0.209079 | -2.118597 |
| 2                | 6                | 0              | 0.953868                | 0.006665  | -0.743296 |
| 3                | 6                | 0              | 2.151347                | 0.128461  | -0.001526 |
| 4                | 6                | 0              | 3.407347                | 0.112670  | -0.618841 |
| 5                | 6                | 0              | 3.500031                | -0.047766 | -2.000776 |
| 6                | 6                | 0              | 2.338512                | -0.221923 | -2.750157 |
| 7                | 1                | 0              | 0.200295                | -0.355912 | -2.729289 |
| 8                | 1                | 0              | 4.312751                | 0.189110  | -0.024135 |
| 9                | 1                | 0              | 4.474308                | -0.058780 | -2.479053 |
| 10               | 1                | 0              | 2.398581                | -0.361029 | -3.826027 |
| 11               | 7                | 0              | 2.071583                | 0.250643  | 1.425148  |
| 12               | 6                | 0              | 2.946135                | 1.201050  | 2.120021  |
| 13               | 1                | 0              | 2.924554                | 2.164616  | 1.604108  |
| 14               | 1                | 0              | 2.599270                | 1.325624  | 3.147588  |
| 15               | 1                | 0              | 3.976079                | 0.832898  | 2.144647  |
| 16               | 6                | 0              | 1.131711                | -0.428716 | 2.070142  |
| 17               | 6                | 0              | 0.291704                | -1.418301 | 1.495573  |
| 18               | 1                | 0              | 1.011203                | -0.160244 | 3.118097  |
| 19               | 1                | 0              | -0.307068               | -1.961134 | 2.219800  |
| 20               | 1                | 0              | 0.742208                | -2.055501 | 0.734016  |
| 21               | 46               | 0              | -0.873194               | -0.109613 | 0.221093  |
| 22               | 15               | 0              | -1.811225               | 1.619593  | -1.293191 |
| 23               | 15               | 0              | -3.036658               | -0.600100 | 1.429252  |
| 24               | 6                | 0              | -4.545609               | -0.916758 | 0.343974  |
| 25               | 1                | 0              | -4.785414               | -0.027256 | -0.243579 |
| 26               | 1                | 0              | -4.329917               | -1.741592 | -0.340713 |
| 27               | 1                | 0              | -5.410965               | -1.178453 | 0.960738  |
| 28               | 6                | 0              | -3.668754               | 0.676436  | 2.664356  |
| 29               | 1                | 0              | -2.906873               | 0.845139  | 3.430178  |
| 30               | 1                | 0              | -3.866907               | 1.623320  | 2.157511  |
| 31               | 1                | 0              | -4.587939               | 0.324096  | 3.142790  |
| 32               | 6                | 0              | -3.027251               | -2.163381 | 2.482662  |
| 33               | 1                | 0              | -2.715244               | -3.016833 | 1.875112  |
| 34               | 1                | 0              | -2.332440               | -2.049604 | 3.318851  |
| 35               | 1                | 0              | -4.029024               | -2.350864 | 2.881197  |
| 36               | 6                | 0              | -3.139624               | 2.748550  | -0.576959 |
| 37               | 1                | 0              | -4.028983               | 2.171820  | -0.312933 |
| 38               | 1                | 0              | -2.754470               | 3.240902  | 0.319913  |
| 39               | 1                | 0              | -3.418536               | 3.510401  | -1.311651 |
| 40               | 6                | 0              | -2.624778               | 0.997176  | -2.874165 |
| 41               | 1                | 0              | -1.906743               | 0.410651  | -3.452464 |
| 42               | 1                | 0              | -3.475741               | 0.358445  | -2.624006 |
| 43               | 1                | 0              | -2.969448               | 1.840911  | -3.480022 |
| 44               | 6                | 0              | -0.568896               | 2.881609  | -1.926202 |
| 45               | 1                | 0              | -0.135000               | 3.414358  | -1.076077 |
| 46               | 1                | 0              | 0.231247                | 2.371816  | -2.464766 |
| 47               | 1                | 0              | -1.067880               | 3.596058  | -2.588221 |

**TS B-to-C**

Zero-point correction= 0.399722 (Hartree/Particle)  
 Thermal correction to Energy= 0.426230  
 Thermal correction to Enthalpy= 0.427174  
 Thermal correction to Gibbs Free Energy= 0.342683  
 Sum of electronic and zero-point Energies= -782.321320  
 Sum of electronic and thermal Energies= -782.294812  
 Sum of electronic and thermal Enthalpies= -782.293868  
 Sum of electronic and thermal Free Energies= -782.378359

| Center Number | Atomic Number | Atomic Type | Coordinates (Angstroms) |           |           |
|---------------|---------------|-------------|-------------------------|-----------|-----------|
|               |               |             | X                       | Y         | Z         |
| 1             | 6             | 0           | 0.073073                | 0.272563  | 0.006358  |
| 2             | 6             | 0           | 0.027453                | 0.233726  | 1.393769  |
| 3             | 6             | 0           | 1.226809                | 0.173650  | 2.142753  |
| 4             | 6             | 0           | 2.457339                | 0.297723  | 1.507911  |
| 5             | 6             | 0           | 2.491222                | 0.431559  | 0.111775  |
| 6             | 6             | 0           | 1.316598                | 0.399843  | -0.636503 |
| 7             | 1             | 0           | -0.837202               | 0.235925  | -0.582447 |
| 8             | 1             | 0           | 3.382781                | 0.247455  | 2.072998  |
| 9             | 1             | 0           | 3.450176                | 0.525192  | -0.388426 |
| 10            | 1             | 0           | 1.355673                | 0.479783  | -1.718719 |
| 11            | 7             | 0           | 1.039266                | -0.118522 | 3.524873  |
| 12            | 6             | 0           | 1.857716                | 0.531147  | 4.540303  |
| 13            | 1             | 0           | 1.718927                | 1.623058  | 4.541492  |
| 14            | 1             | 0           | 1.596458                | 0.128184  | 5.521651  |
| 15            | 1             | 0           | 2.913085                | 0.312509  | 4.364033  |
| 16            | 6             | 0           | -0.308394               | -0.368643 | 3.751057  |
| 17            | 6             | 0           | -0.983718               | -1.004328 | 2.657645  |
| 18            | 1             | 0           | -0.650820               | -0.423365 | 4.776785  |
| 19            | 1             | 0           | -2.054108               | -1.184061 | 2.763696  |
| 20            | 1             | 0           | -0.496668               | -1.790038 | 2.086340  |
| 21            | 46            | 0           | -1.475196               | 1.226872  | 2.643094  |
| 22            | 15            | 0           | -2.626591               | 2.646116  | 0.829714  |
| 23            | 15            | 0           | -2.316127               | 2.391815  | 4.662157  |
| 24            | 6             | 0           | -1.825831               | 1.707498  | 6.349800  |
| 25            | 1             | 0           | -2.202476               | 0.686552  | 6.460811  |
| 26            | 1             | 0           | -0.736950               | 1.700330  | 6.445809  |
| 27            | 1             | 0           | -2.249503               | 2.327324  | 7.146188  |
| 28            | 6             | 0           | -1.787314               | 4.193945  | 4.819924  |
| 29            | 1             | 0           | -0.697650               | 4.248989  | 4.887056  |
| 30            | 1             | 0           | -2.110589               | 4.754444  | 3.939618  |
| 31            | 1             | 0           | -2.228448               | 4.643384  | 5.715252  |
| 32            | 6             | 0           | -4.188941               | 2.487208  | 4.839220  |
| 33            | 1             | 0           | -4.617381               | 3.002858  | 3.977683  |
| 34            | 1             | 0           | -4.602113               | 1.476075  | 4.884567  |
| 35            | 1             | 0           | -4.455426               | 3.028235  | 5.752663  |
| 36            | 6             | 0           | -3.908437               | 3.974529  | 1.232140  |
| 37            | 1             | 0           | -4.782257               | 3.517297  | 1.703824  |
| 38            | 1             | 0           | -3.482648               | 4.717533  | 1.911504  |
| 39            | 1             | 0           | -4.227514               | 4.478949  | 0.314394  |
| 40            | 6             | 0           | -1.413100               | 3.626609  | -0.230221 |
| 41            | 1             | 0           | -0.946180               | 4.404578  | 0.380264  |
| 42            | 1             | 0           | -0.630761               | 2.959425  | -0.598010 |
| 43            | 1             | 0           | -1.930060               | 4.092118  | -1.075154 |
| 44            | 6             | 0           | -3.583259               | 1.649850  | -0.460335 |
| 45            | 1             | 0           | -2.939220               | 0.891266  | -0.911224 |
| 46            | 1             | 0           | -4.425398               | 1.147294  | 0.023252  |
| 47            | 1             | 0           | -3.961450               | 2.309503  | -1.247933 |

## E

```

Zero-point correction=          0.388611 (Hartree/Particle)
Thermal correction to Energy=      0.415001
Thermal correction to Enthalpy=    0.415946
Thermal correction to Gibbs Free Energy= 0.331956
Sum of electronic and zero-point Energies= -781.937582
Sum of electronic and thermal Energies= -781.911192
Sum of electronic and thermal Enthalpies= -781.910248
Sum of electronic and thermal Free Energies= -781.994238

```

| Center<br>Number | Atomic<br>Number | Atomic<br>Type | Coordinates (Angstroms) |           |           |
|------------------|------------------|----------------|-------------------------|-----------|-----------|
|                  |                  |                | X                       | Y         | Z         |
| 1                | 6                | 0              | -1.497100               | 1.382870  | -1.473497 |
| 2                | 6                | 0              | -0.537883               | 1.106427  | -0.484397 |
| 3                | 6                | 0              | -0.376217               | 2.071504  | 0.541800  |
| 4                | 6                | 0              | -1.265220               | 3.168221  | 0.618204  |
| 5                | 6                | 0              | -2.241199               | 3.373932  | -0.352301 |
| 6                | 6                | 0              | -2.343580               | 2.495012  | -1.429266 |
| 7                | 1                | 0              | -1.595450               | 0.701083  | -2.315450 |
| 8                | 1                | 0              | -1.175602               | 3.892103  | 1.420616  |
| 9                | 1                | 0              | -2.899590               | 4.235945  | -0.274252 |
| 10               | 1                | 0              | -3.072598               | 2.663264  | -2.218695 |
| 11               | 7                | 0              | 0.685632                | 1.982319  | 1.453810  |
| 12               | 6                | 0              | 0.775657                | 2.926580  | 2.552292  |
| 13               | 1                | 0              | -0.143433               | 2.914872  | 3.148925  |
| 14               | 1                | 0              | 1.599994                | 2.631883  | 3.205264  |
| 15               | 1                | 0              | 0.952103                | 3.961198  | 2.216400  |
| 16               | 6                | 0              | 1.845627                | 1.284455  | 1.102038  |
| 17               | 6                | 0              | 1.955759                | 0.309480  | 0.186456  |
| 18               | 1                | 0              | 2.722471                | 1.633783  | 1.649293  |
| 19               | 1                | 0              | 2.967161                | -0.041593 | -0.007353 |
| 20               | 15               | 0              | -1.783450               | -1.966490 | -1.017448 |
| 21               | 15               | 0              | 1.881756                | -2.742525 | -0.913884 |
| 22               | 46               | 0              | 0.416803                | -0.704423 | -0.595822 |
| 23               | 6                | 0              | 1.619742                | -3.790520 | -2.468188 |
| 24               | 1                | 0              | 0.607950                | -4.204740 | -2.475921 |
| 25               | 1                | 0              | 1.738714                | -3.154136 | -3.349705 |
| 26               | 1                | 0              | 2.342587                | -4.612109 | -2.515197 |
| 27               | 6                | 0              | 1.909768                | -4.075637 | 0.427535  |
| 28               | 1                | 0              | 2.174740                | -3.608969 | 1.380281  |
| 29               | 1                | 0              | 0.917700                | -4.523157 | 0.526690  |
| 30               | 1                | 0              | 2.637682                | -4.859184 | 0.190170  |
| 31               | 6                | 0              | 3.730931                | -2.396348 | -1.073354 |
| 32               | 1                | 0              | 3.897326                | -1.678934 | -1.881223 |
| 33               | 1                | 0              | 4.103560                | -1.962992 | -0.142139 |
| 34               | 1                | 0              | 4.277038                | -3.321428 | -1.285165 |
| 35               | 6                | 0              | -2.532500               | -2.156249 | -2.746689 |
| 36               | 1                | 0              | -2.675620               | -1.167085 | -3.188846 |
| 37               | 1                | 0              | -1.844778               | -2.722889 | -3.381192 |
| 38               | 1                | 0              | -3.496983               | -2.674012 | -2.704033 |
| 39               | 6                | 0              | -1.892488               | -3.757055 | -0.411725 |
| 40               | 1                | 0              | -1.220647               | -4.395838 | -0.991790 |
| 41               | 1                | 0              | -1.592925               | -3.796708 | 0.639347  |
| 42               | 1                | 0              | -2.914278               | -4.139486 | -0.507741 |
| 43               | 6                | 0              | -3.233126               | -1.225968 | -0.064279 |
| 44               | 1                | 0              | -2.991774               | -1.235941 | 1.002112  |
| 45               | 1                | 0              | -3.371360               | -0.188476 | -0.374237 |
| 46               | 1                | 0              | -4.148911               | -1.800740 | -0.240324 |



**TS E-to-D**

```

Zero-point correction=          0.386560 (Hartree/Particle)
Thermal correction to Energy=    0.412834
Thermal correction to Enthalpy=  0.413778
Thermal correction to Gibbs Free Energy=  0.329249
Sum of electronic and zero-point Energies= -781.925387
Sum of electronic and thermal Energies= -781.899113
Sum of electronic and thermal Enthalpies= -781.898169
Sum of electronic and thermal Free Energies= -781.982699
  
```

| Center Number | Atomic Number | Atomic Type | Coordinates (Angstroms) |           |           |
|---------------|---------------|-------------|-------------------------|-----------|-----------|
|               |               |             | X                       | Y         | Z         |
| 1             | 6             | 0           | 1.232801                | 1.460659  | -1.299975 |
| 2             | 6             | 0           | 0.932826                | 0.268987  | -0.607407 |
| 3             | 6             | 0           | 1.969233                | -0.296501 | 0.188263  |
| 4             | 6             | 0           | 3.143383                | 0.426052  | 0.463864  |
| 5             | 6             | 0           | 3.362899                | 1.652112  | -0.161192 |
| 6             | 6             | 0           | 2.428425                | 2.147855  | -1.081079 |
| 7             | 1             | 0           | 0.500835                | 1.875012  | -1.989074 |
| 8             | 1             | 0           | 3.905175                | 0.011578  | 1.118128  |
| 9             | 1             | 0           | 4.283420                | 2.196567  | 0.033572  |
| 10            | 1             | 0           | 2.624175                | 3.078064  | -1.610056 |
| 11            | 7             | 0           | 1.804305                | -1.637791 | 0.520437  |
| 12            | 6             | 0           | 2.831936                | -2.380965 | 1.220438  |
| 13            | 1             | 0           | 3.016401                | -1.951341 | 2.211692  |
| 14            | 1             | 0           | 2.492961                | -3.410220 | 1.358845  |
| 15            | 1             | 0           | 3.784487                | -2.394593 | 0.669007  |
| 16            | 6             | 0           | 0.876616                | -2.283802 | -0.294848 |
| 17            | 6             | 0           | -0.031536               | -1.554067 | -0.987872 |
| 18            | 1             | 0           | 1.042912                | -3.351040 | -0.432071 |
| 19            | 1             | 0           | -0.546009               | -2.024929 | -1.825428 |
| 20            | 46            | 0           | -1.074757               | -0.001813 | -0.154436 |
| 21            | 15            | 0           | -1.454839               | 2.194341  | 1.065312  |
| 22            | 15            | 0           | -3.386292               | -1.039546 | -0.099049 |
| 23            | 6             | 0           | -3.602974               | -2.478405 | -1.304534 |
| 24            | 1             | 0           | -3.542799               | -2.101226 | -2.329669 |
| 25            | 1             | 0           | -2.787580               | -3.190523 | -1.151989 |
| 26            | 1             | 0           | -4.564092               | -2.983405 | -1.159906 |
| 27            | 6             | 0           | -3.855412               | -1.883397 | 1.528486  |
| 28            | 1             | 0           | -3.069199               | -2.594189 | 1.797645  |
| 29            | 1             | 0           | -3.924843               | -1.131398 | 2.319721  |
| 30            | 1             | 0           | -4.812033               | -2.411493 | 1.446408  |
| 31            | 6             | 0           | -4.972580               | -0.064947 | -0.450910 |
| 32            | 1             | 0           | -5.072686               | 0.741791  | 0.281012  |
| 33            | 1             | 0           | -4.907285               | 0.379679  | -1.448233 |
| 34            | 1             | 0           | -5.858908               | -0.707109 | -0.399783 |
| 35            | 6             | 0           | -2.905235               | 2.540720  | 2.235018  |
| 36            | 1             | 0           | -3.846140               | 2.482837  | 1.679384  |
| 37            | 1             | 0           | -2.920601               | 1.783096  | 3.024266  |
| 38            | 1             | 0           | -2.822459               | 3.532587  | 2.693245  |
| 39            | 6             | 0           | -1.511429               | 3.745841  | -0.015555 |
| 40            | 1             | 0           | -0.622841               | 3.754884  | -0.651693 |
| 41            | 1             | 0           | -2.399615               | 3.717442  | -0.653463 |
| 42            | 1             | 0           | -1.530750               | 4.655480  | 0.594843  |
| 43            | 6             | 0           | 0.003479                | 2.613162  | 2.190598  |
| 44            | 1             | 0           | 0.061880                | 1.871536  | 2.992229  |
| 45            | 1             | 0           | 0.923673                | 2.560871  | 1.602885  |
| 46            | 1             | 0           | -0.104641               | 3.612959  | 2.625885  |

**System with *cis* methyl groups on the enamine carbons:**

**A**, the **A**→**B** transition state structure, **B**, and the **B**→**C** transition state structure were recomputed using a reactant with *cis* methyl groups on the two alkene carbons of the enamine. Energies (kcal/mol) relative to that of **A**: +9.9 (**A**→**B**), -15.5 (**B**), +9.8 (**B**→**C**). Also, the predicted **E**→**D** barrier for this system is 1.7 kcal/mol. Although not by much, the **A**→**B** barrier is predicted to be larger for this system than that for the system shown in Figure 1, an effect that is likely to be larger with larger groups on the enamine or phosphines, since the [Pd(PR<sub>3</sub>)] group moves from the nitrogen over the enamine C=C bond during the **A**→**B** reaction.

**A**  
 Zero-point correction= 0.279009 (Hartree/Particle)  
 Thermal correction to Energy= 0.299594  
 Thermal correction to Enthalpy= 0.300538  
 Thermal correction to Gibbs Free Energy= 0.228559  
 Sum of electronic and zero-point Energies= -625.148041  
 Sum of electronic and thermal Energies= -625.127456  
 Sum of electronic and thermal Enthalpies= -625.126512  
 Sum of electronic and thermal Free Energies= -625.198491

| Center Number | Atomic Number | Atomic Type | Coordinates (Angstroms) |           |           |
|---------------|---------------|-------------|-------------------------|-----------|-----------|
|               |               |             | X                       | Y         | Z         |
| 1             | 6             | 0           | 1.138358                | 0.501827  | -2.383808 |
| 2             | 6             | 0           | 0.802646                | 0.194085  | -1.068529 |
| 3             | 6             | 0           | 1.765739                | -0.280910 | -0.194012 |
| 4             | 6             | 0           | 3.096872                | -0.461740 | -0.557554 |
| 5             | 6             | 0           | 3.436768                | -0.153474 | -1.879569 |
| 6             | 6             | 0           | 2.471475                | 0.316971  | -2.777360 |
| 7             | 1             | 0           | 0.417999                | 0.881450  | -3.102272 |
| 8             | 1             | 0           | 3.841127                | -0.832864 | 0.140600  |
| 9             | 1             | 0           | 4.462400                | -0.280247 | -2.212186 |
| 10            | 1             | 0           | 2.760478                | 0.550450  | -3.798277 |
| 11            | 7             | 0           | 1.151104                | -0.474462 | 1.137489  |
| 12            | 6             | 0           | 1.724750                | 0.496085  | 2.116091  |
| 13            | 1             | 0           | 1.756364                | 1.479397  | 1.646558  |
| 14            | 1             | 0           | 1.105272                | 0.548351  | 3.011326  |
| 15            | 1             | 0           | 2.741502                | 0.197815  | 2.398434  |
| 16            | 6             | 0           | 1.087795                | -1.858652 | 1.634595  |
| 17            | 6             | 0           | 1.355663                | -2.892864 | 0.820840  |
| 18            | 1             | 0           | 1.641099                | -2.676338 | -0.204467 |
| 19            | 46            | 0           | -0.750607               | 0.224218  | 0.200418  |
| 20            | 15            | 0           | -2.332978               | 0.971706  | -1.433134 |
| 21            | 1             | 0           | -3.446983               | 0.121647  | -1.701500 |
| 22            | 1             | 0           | -3.002821               | 2.205394  | -1.179016 |
| 23            | 1             | 0           | -1.854118               | 1.200067  | -2.754066 |
| 24            | 15            | 0           | -2.454499               | 0.182813  | 2.115832  |
| 25            | 1             | 0           | -3.717540               | 0.836817  | 1.961192  |
| 26            | 1             | 0           | -2.925196               | -1.084949 | 2.579820  |
| 27            | 1             | 0           | -2.077166               | 0.755252  | 3.370688  |
| 28            | 6             | 0           | 0.662789                | -1.983755 | 3.074820  |
| 29            | 1             | 0           | 0.403558                | -3.015366 | 3.312618  |
| 30            | 1             | 0           | 1.450774                | -1.676230 | 3.772320  |
| 31            | 1             | 0           | -0.217872               | -1.367247 | 3.291980  |
| 32            | 6             | 0           | 1.312082                | -4.355620 | 1.154307  |
| 33            | 1             | 0           | 2.299887                | -4.807559 | 0.996532  |
| 34            | 1             | 0           | 1.011196                | -4.571100 | 2.181671  |
| 35            | 1             | 0           | 0.621742                | -4.879297 | 0.480342  |

**TS A-to-B**

```

Zero-point correction=          0.278059 (Hartree/Particle)
Thermal correction to Energy=    0.298119
Thermal correction to Enthalpy=  0.299064
Thermal correction to Gibbs Free Energy= 0.228803
Sum of electronic and zero-point Energies= -625.132581
Sum of electronic and thermal Energies= -625.112520
Sum of electronic and thermal Enthalpies= -625.111576
Sum of electronic and thermal Free Energies= -625.181837
  
```

---

| Center Number | Atomic Number | Atomic Type | Coordinates (Angstroms) |           |           |
|---------------|---------------|-------------|-------------------------|-----------|-----------|
|               |               |             | X                       | Y         | Z         |
| 1             | 6             | 0           | 0.232688                | 0.300967  | -0.133807 |
| 2             | 6             | 0           | 0.018122                | 0.202068  | 1.233738  |
| 3             | 6             | 0           | 1.082490                | 0.038560  | 2.123463  |
| 4             | 6             | 0           | 2.392278                | -0.025948 | 1.650738  |
| 5             | 6             | 0           | 2.620118                | 0.085527  | 0.274107  |
| 6             | 6             | 0           | 1.552958                | 0.238832  | -0.609737 |
| 7             | 1             | 0           | -0.577661               | 0.409547  | -0.848837 |
| 8             | 1             | 0           | 3.224298                | -0.151257 | 2.337332  |
| 9             | 1             | 0           | 3.636302                | 0.045928  | -0.105821 |
| 10            | 1             | 0           | 1.736166                | 0.306484  | -1.678168 |
| 11            | 7             | 0           | 0.688815                | -0.032958 | 3.516121  |
| 12            | 6             | 0           | 1.566596                | 0.710242  | 4.437916  |
| 13            | 1             | 0           | 1.832083                | 1.658236  | 3.967237  |
| 14            | 1             | 0           | 1.046240                | 0.927319  | 5.371012  |
| 15            | 1             | 0           | 2.487994                | 0.158634  | 4.672499  |
| 16            | 6             | 0           | 0.134781                | -1.292911 | 3.982753  |
| 17            | 6             | 0           | -0.058525               | -2.346573 | 3.150058  |
| 18            | 1             | 0           | 0.320647                | -2.272362 | 2.135515  |
| 19            | 46            | 0           | -1.579547               | 0.184683  | 2.456175  |
| 20            | 15            | 0           | -2.889554               | 1.207633  | 0.773166  |
| 21            | 1             | 0           | -3.097167               | 0.456639  | -0.419527 |
| 22            | 1             | 0           | -4.227839               | 1.569700  | 1.103812  |
| 23            | 1             | 0           | -2.392990               | 2.433686  | 0.246120  |
| 24            | 15            | 0           | -3.405144               | 0.056104  | 4.251627  |
| 25            | 1             | 0           | -3.306658               | 0.897243  | 5.403521  |
| 26            | 1             | 0           | -4.763712               | 0.331985  | 3.899534  |
| 27            | 1             | 0           | -3.599229               | -1.200563 | 4.903410  |
| 28            | 6             | 0           | -0.185625               | -1.317369 | 5.457795  |
| 29            | 1             | 0           | -0.815782               | -2.170993 | 5.708561  |
| 30            | 1             | 0           | 0.728858                | -1.408739 | 6.056183  |
| 31            | 1             | 0           | -0.693992               | -0.404147 | 5.786721  |
| 32            | 6             | 0           | -0.687907               | -3.670654 | 3.485913  |
| 33            | 1             | 0           | -1.402423               | -3.966642 | 2.708370  |
| 34            | 1             | 0           | 0.076374                | -4.458751 | 3.520356  |
| 35            | 1             | 0           | -1.212320               | -3.684071 | 4.444632  |

---

**B**

```

Zero-point correction=          0.279194 (Hartree/Particle)
Thermal correction to Energy=    0.299569
Thermal correction to Enthalpy=   0.300513
Thermal correction to Gibbs Free Energy= 0.229859
Sum of electronic and zero-point Energies= -625.174041
Sum of electronic and thermal Energies= -625.153667
Sum of electronic and thermal Enthalpies= -625.152723
Sum of electronic and thermal Free Energies= -625.223376

```

| Center<br>Number | Atomic<br>Number | Atomic<br>Type | Coordinates (Angstroms) |           |           |
|------------------|------------------|----------------|-------------------------|-----------|-----------|
|                  |                  |                | X                       | Y         | Z         |
| 1                | 6                | 0              | 0.839689                | -0.102290 | -2.194626 |
| 2                | 6                | 0              | 0.831799                | -0.010727 | -0.800067 |
| 3                | 6                | 0              | 2.074870                | -0.041049 | -0.132002 |
| 4                | 6                | 0              | 3.276226                | -0.120791 | -0.847576 |
| 5                | 6                | 0              | 3.258322                | -0.159007 | -2.241085 |
| 6                | 6                | 0              | 2.039519                | -0.151958 | -2.915898 |
| 7                | 1                | 0              | -0.097220               | -0.125982 | -2.744044 |
| 8                | 1                | 0              | 4.223484                | -0.193489 | -0.321251 |
| 9                | 1                | 0              | 4.192939                | -0.216718 | -2.789841 |
| 10               | 1                | 0              | 2.014517                | -0.185435 | -4.001290 |
| 11               | 7                | 0              | 2.105582                | -0.018401 | 1.303210  |
| 12               | 6                | 0              | 3.024793                | 0.921430  | 1.967988  |
| 13               | 1                | 0              | 3.775456                | 1.243181  | 1.250121  |
| 14               | 1                | 0              | 2.481426                | 1.808220  | 2.314365  |
| 15               | 1                | 0              | 3.524948                | 0.448216  | 2.815306  |
| 16               | 6                | 0              | 1.171390                | -0.689298 | 1.989548  |
| 17               | 6                | 0              | 0.270097                | -1.599394 | 1.320579  |
| 18               | 1                | 0              | 0.735907                | -2.066809 | 0.451233  |
| 19               | 46               | 0              | -0.901024               | -0.093239 | 0.286566  |
| 20               | 15               | 0              | -1.808455               | 1.820325  | -1.042248 |
| 21               | 1                | 0              | -1.874357               | 1.677904  | -2.462607 |
| 22               | 1                | 0              | -3.105781               | 2.379632  | -0.809255 |
| 23               | 1                | 0              | -1.030313               | 3.015563  | -0.970715 |
| 24               | 15               | 0              | -3.052626               | -0.382077 | 1.607824  |
| 25               | 1                | 0              | -4.174510               | 0.461565  | 1.329414  |
| 26               | 1                | 0              | -3.708786               | -1.648825 | 1.508717  |
| 27               | 1                | 0              | -3.047563               | -0.255218 | 3.033337  |
| 28               | 6                | 0              | -0.509403               | -2.625667 | 2.132973  |
| 29               | 1                | 0              | -1.165522               | -3.198020 | 1.471149  |
| 30               | 1                | 0              | 0.165373                | -3.347508 | 2.614190  |
| 31               | 1                | 0              | -1.131829               | -2.189733 | 2.920430  |
| 32               | 6                | 0              | 1.117835                | -0.486974 | 3.479108  |
| 33               | 1                | 0              | 1.954524                | -1.014249 | 3.957007  |
| 34               | 1                | 0              | 1.193128                | 0.567571  | 3.758524  |
| 35               | 1                | 0              | 0.198810                | -0.893144 | 3.898094  |

**TS B-to-C**

```

Zero-point correction=          0.276047 (Hartree/Particle)
Thermal correction to Energy=    0.296965
Thermal correction to Enthalpy=  0.297909
Thermal correction to Gibbs Free Energy=  0.224604
Sum of electronic and zero-point Energies= -625.128492
Sum of electronic and thermal Energies= -625.107573
Sum of electronic and thermal Enthalpies= -625.106629
Sum of electronic and thermal Free Energies= -625.179934
  
```

| Center Number | Atomic Number | Atomic Type | Coordinates (Angstroms) |           |           |
|---------------|---------------|-------------|-------------------------|-----------|-----------|
|               |               |             | X                       | Y         | Z         |
| 1             | 6             | 0           | -0.065382               | 0.217955  | 0.140905  |
| 2             | 6             | 0           | -0.050091               | 0.189216  | 1.536214  |
| 3             | 6             | 0           | 1.197621                | 0.120370  | 2.199459  |
| 4             | 6             | 0           | 2.398182                | 0.231719  | 1.506217  |
| 5             | 6             | 0           | 2.360184                | 0.377655  | 0.114140  |
| 6             | 6             | 0           | 1.140788                | 0.351817  | -0.562367 |
| 7             | 1             | 0           | -1.004752               | 0.181791  | -0.401012 |
| 8             | 1             | 0           | 3.352382                | 0.170938  | 2.019351  |
| 9             | 1             | 0           | 3.289025                | 0.476434  | -0.438061 |
| 10            | 1             | 0           | 1.118963                | 0.445481  | -1.644149 |
| 11            | 7             | 0           | 1.092535                | -0.174553 | 3.593026  |
| 12            | 6             | 0           | 2.165555                | 0.189074  | 4.514704  |
| 13            | 1             | 0           | 2.296574                | 1.277202  | 4.533270  |
| 14            | 1             | 0           | 1.940880                | -0.171762 | 5.516575  |
| 15            | 1             | 0           | 3.100026                | -0.275487 | 4.190235  |
| 16            | 6             | 0           | -0.142812               | -0.568454 | 3.948331  |
| 17            | 6             | 0           | -0.986116               | -0.959949 | 2.826858  |
| 18            | 1             | 0           | -0.495525               | -1.726578 | 2.220755  |
| 19            | 46            | 0           | -1.533977               | 1.310291  | 2.593756  |
| 20            | 15            | 0           | -2.715092               | 2.660432  | 0.711539  |
| 21            | 1             | 0           | -1.992532               | 3.769915  | 0.157122  |
| 22            | 1             | 0           | -3.035731               | 2.022015  | -0.535024 |
| 23            | 1             | 0           | -3.970599               | 3.336238  | 0.888396  |
| 24            | 15            | 0           | -2.237018               | 2.735355  | 4.523221  |
| 25            | 1             | 0           | -1.685751               | 4.057388  | 4.566455  |
| 26            | 1             | 0           | -3.618249               | 3.100677  | 4.645452  |
| 27            | 1             | 0           | -2.015689               | 2.398822  | 5.902979  |
| 28            | 6             | 0           | -2.436067               | -1.395192 | 3.023933  |
| 29            | 1             | 0           | -2.948158               | -1.423271 | 2.058334  |
| 30            | 1             | 0           | -2.459574               | -2.416235 | 3.430363  |
| 31            | 1             | 0           | -3.008841               | -0.741310 | 3.685799  |
| 32            | 6             | 0           | -0.523660               | -0.751820 | 5.385163  |
| 33            | 1             | 0           | -0.033654               | -1.650400 | 5.785305  |
| 34            | 1             | 0           | -0.227341               | 0.094707  | 6.010708  |
| 35            | 1             | 0           | -1.599745               | -0.896111 | 5.480938  |

## E

```

Zero-point correction=          0.264693 (Hartree/Particle)
Thermal correction to Energy=    0.285293
Thermal correction to Enthalpy=  0.286237
Thermal correction to Gibbs Free Energy= 0.214782
Sum of electronic and zero-point Energies= -624.744098
Sum of electronic and thermal Energies= -624.723498
Sum of electronic and thermal Enthalpies= -624.722554
Sum of electronic and thermal Free Energies= -624.794009

```

| Center<br>Number | Atomic<br>Number | Atomic<br>Type | Coordinates (Angstroms) |           |           |
|------------------|------------------|----------------|-------------------------|-----------|-----------|
|                  |                  |                | X                       | Y         | Z         |
| 1                | 6                | 0              | -1.425588               | 1.399062  | -1.521779 |
| 2                | 6                | 0              | -0.441527               | 1.119509  | -0.563266 |
| 3                | 6                | 0              | -0.261558               | 2.034777  | 0.497852  |
| 4                | 6                | 0              | -1.147543               | 3.122610  | 0.633404  |
| 5                | 6                | 0              | -2.151382               | 3.347795  | -0.308021 |
| 6                | 6                | 0              | -2.279838               | 2.502367  | -1.408406 |
| 7                | 1                | 0              | -1.544090               | 0.738264  | -2.378165 |
| 8                | 1                | 0              | -1.029523               | 3.824782  | 1.453020  |
| 9                | 1                | 0              | -2.811301               | 4.204081  | -0.190134 |
| 10               | 1                | 0              | -3.037255               | 2.688843  | -2.166142 |
| 11               | 7                | 0              | 0.820310                | 1.877125  | 1.381939  |
| 12               | 6                | 0              | 0.781724                | 2.542949  | 2.671081  |
| 13               | 1                | 0              | -0.231236               | 2.476545  | 3.079265  |
| 14               | 1                | 0              | 1.450115                | 2.036867  | 3.372021  |
| 15               | 1                | 0              | 1.064809                | 3.608352  | 2.638298  |
| 16               | 6                | 0              | 2.052267                | 1.392194  | 0.856818  |
| 18               | 15               | 0              | -1.777982               | -1.890792 | -0.882235 |
| 19               | 1                | 0              | -2.473027               | -1.712107 | -2.126570 |
| 20               | 1                | 0              | -2.033411               | -3.303579 | -0.746334 |
| 21               | 1                | 0              | -2.831347               | -1.437361 | -0.023171 |
| 22               | 15               | 0              | 1.712968                | -2.895565 | -0.183910 |
| 23               | 1                | 0              | 2.797145                | -2.897704 | 0.755437  |
| 24               | 1                | 0              | 1.029364                | -4.048597 | 0.339267  |
| 25               | 1                | 0              | 2.398413                | -3.583187 | -1.247177 |
| 26               | 46               | 0              | 0.458947                | -0.702678 | -0.506219 |
| 27               | 6                | 0              | 3.280509                | 2.101306  | 1.396534  |
| 28               | 1                | 0              | 3.199768                | 3.190406  | 1.278092  |
| 29               | 1                | 0              | 3.432191                | 1.906235  | 2.465857  |
| 30               | 1                | 0              | 4.187518                | 1.772524  | 0.887819  |
| 31               | 6                | 0              | 3.309266                | 0.097380  | -0.920156 |
| 32               | 1                | 0              | 4.118930                | 0.832199  | -0.823129 |
| 33               | 1                | 0              | 3.737969                | -0.882906 | -0.658418 |
| 34               | 1                | 0              | 3.057859                | 0.048217  | -1.986565 |

**TS E-to-D**

Zero-point correction= 0.263086 (Hartree/Particle)  
 Thermal correction to Energy= 0.283575  
 Thermal correction to Enthalpy= 0.284520  
 Thermal correction to Gibbs Free Energy= 0.212585  
 Sum of electronic and zero-point Energies= -624.739166  
 Sum of electronic and thermal Energies= -624.718676  
 Sum of electronic and thermal Enthalpies= -624.717732  
 Sum of electronic and thermal Free Energies= -624.789666

| Center<br>Number | Atomic<br>Number | Atomic<br>Type | Coordinates (Angstroms) |           |           |
|------------------|------------------|----------------|-------------------------|-----------|-----------|
|                  |                  |                | X                       | Y         | Z         |
| 1                | 6                | 0              | 1.256042                | 1.513188  | -1.222152 |
| 2                | 6                | 0              | 0.956147                | 0.276267  | -0.622554 |
| 3                | 6                | 0              | 1.972973                | -0.358846 | 0.133422  |
| 4                | 6                | 0              | 3.165203                | 0.321089  | 0.438721  |
| 5                | 6                | 0              | 3.403634                | 1.580136  | -0.110404 |
| 6                | 6                | 0              | 2.469231                | 2.161438  | -0.974492 |
| 7                | 1                | 0              | 0.518797                | 1.994168  | -1.861240 |
| 8                | 1                | 0              | 3.929352                | -0.149158 | 1.050751  |
| 9                | 1                | 0              | 4.339663                | 2.088798  | 0.106473  |
| 10               | 1                | 0              | 2.674739                | 3.124821  | -1.435546 |
| 11               | 7                | 0              | 1.770287                | -1.708702 | 0.419263  |
| 12               | 6                | 0              | 2.690528                | -2.425446 | 1.280185  |
| 13               | 1                | 0              | 2.871776                | -1.844324 | 2.190373  |
| 14               | 1                | 0              | 2.254875                | -3.379675 | 1.579786  |
| 15               | 1                | 0              | 3.663495                | -2.622745 | 0.802991  |
| 16               | 6                | 0              | 0.884854                | -2.358387 | -0.465038 |
| 17               | 6                | 0              | -0.033973               | -1.602385 | -1.125114 |
| 18               | 46               | 0              | -1.019346               | -0.076112 | -0.153761 |
| 19               | 15               | 0              | -1.467103               | 2.153920  | 1.000291  |
| 20               | 1                | 0              | -1.400834               | 3.318682  | 0.159246  |
| 21               | 1                | 0              | -2.569851               | 2.613878  | 1.814647  |
| 22               | 1                | 0              | -0.424714               | 2.548074  | 1.905771  |
| 23               | 15               | 0              | -3.295451               | -1.128519 | 0.244378  |
| 24               | 1                | 0              | -3.483737               | -2.506676 | -0.124959 |
| 25               | 1                | 0              | -3.758121               | -1.268147 | 1.601267  |
| 26               | 1                | 0              | -4.547492               | -0.650784 | -0.291095 |
| 27               | 6                | 0              | -0.721290               | -2.008240 | -2.406251 |
| 28               | 1                | 0              | -0.220609               | -2.844178 | -2.914633 |
| 29               | 1                | 0              | -1.774495               | -2.290126 | -2.259016 |
| 30               | 1                | 0              | -0.724661               | -1.168549 | -3.111238 |
| 31               | 6                | 0              | 1.134546                | -3.826716 | -0.715044 |
| 32               | 1                | 0              | 2.178621                | -4.032993 | -0.988794 |
| 33               | 1                | 0              | 0.906495                | -4.437205 | 0.169313  |
| 34               | 1                | 0              | 0.495103                | -4.192606 | -1.520452 |

**System with terminal CO<sub>2</sub>Me on enamine:**

**A**, the **A**→**B** transition state structure, and **B** were recomputed using a reactant with a carbomethoxy group on the terminal alkene carbon of the enamine. Energies (kcal/mol) relative to that of **A**: +6.0 (**A**→**B**), -16.6 (**B**). Also, the predicted **E**→**D** barrier for this system is 4.1 kcal/mol. This suggests that the inherent electronic effect of a terminal ester actually favors reaction.

**A**

Zero-point correction= 0.265812 (Hartree/Particle)  
 Thermal correction to Energy= 0.288038  
 Thermal correction to Enthalpy= 0.288982  
 Thermal correction to Gibbs Free Energy= 0.211222  
 Sum of electronic and zero-point Energies= -774.405341  
 Sum of electronic and thermal Energies= -774.383115  
 Sum of electronic and thermal Enthalpies= -774.382171  
 Sum of electronic and thermal Free Energies= -774.459931

| Center Number | Atomic Number | Atomic Type | Coordinates (Angstroms) |           |           |
|---------------|---------------|-------------|-------------------------|-----------|-----------|
|               |               |             | X                       | Y         | Z         |
| 1             | 6             | 0           | 1.177211                | 0.577623  | -2.430272 |
| 2             | 6             | 0           | 0.842326                | 0.259894  | -1.118287 |
| 3             | 6             | 0           | 1.810032                | -0.218992 | -0.248376 |
| 4             | 6             | 0           | 3.137586                | -0.409042 | -0.614432 |
| 5             | 6             | 0           | 3.475605                | -0.091626 | -1.935372 |
| 6             | 6             | 0           | 2.510715                | 0.392827  | -2.825558 |
| 7             | 1             | 0           | 0.455960                | 0.959169  | -3.146680 |
| 8             | 1             | 0           | 3.880584                | -0.787371 | 0.081520  |
| 9             | 1             | 0           | 4.499256                | -0.222266 | -2.272122 |
| 10            | 1             | 0           | 2.798524                | 0.633076  | -3.845181 |
| 11            | 7             | 0           | 1.200015                | -0.438837 | 1.079040  |
| 12            | 6             | 0           | 1.716129                | 0.486350  | 2.128013  |
| 13            | 1             | 0           | 1.669327                | 1.509059  | 1.753625  |
| 14            | 1             | 0           | 1.099282                | 0.394544  | 3.025298  |
| 15            | 1             | 0           | 2.752496                | 0.235068  | 2.379451  |
| 16            | 6             | 0           | 1.088868                | -1.786106 | 1.536914  |
| 17            | 6             | 0           | 1.321482                | -2.901854 | 0.835150  |
| 18            | 1             | 0           | 0.750066                | -1.871318 | 2.566470  |
| 19            | 1             | 0           | 1.675766                | -2.904629 | -0.189022 |
| 20            | 46            | 0           | -0.720388               | 0.209635  | 0.142622  |
| 21            | 15            | 0           | -2.310524               | 0.986809  | -1.456265 |
| 22            | 1             | 0           | -3.361877               | 0.091839  | -1.812093 |
| 23            | 1             | 0           | -3.055263               | 2.151637  | -1.108655 |
| 24            | 1             | 0           | -1.821597               | 1.352378  | -2.741705 |
| 25            | 15            | 0           | -2.387358               | -0.091178 | 2.063813  |
| 26            | 1             | 0           | -3.578406               | 0.695081  | 2.145517  |
| 27            | 1             | 0           | -2.959483               | -1.390075 | 2.226235  |
| 28            | 1             | 0           | -1.902296               | 0.110810  | 3.392936  |
| 29            | 6             | 0           | 1.074770                | -4.205451 | 1.504533  |
| 30            | 8             | 0           | 0.597629                | -4.333313 | 2.616604  |
| 31            | 8             | 0           | 1.450853                | -5.222235 | 0.712566  |
| 32            | 6             | 0           | 1.269818                | -6.542674 | 1.263698  |
| 33            | 1             | 0           | 1.619256                | -7.228428 | 0.492751  |
| 34            | 1             | 0           | 1.857471                | -6.654778 | 2.177958  |
| 35            | 1             | 0           | 0.215213                | -6.717363 | 1.490177  |



**TS A-to-B**

```

Zero-point correction=          0.265216 (Hartree/Particle)
Thermal correction to Energy=    0.286677
Thermal correction to Enthalpy=  0.287621
Thermal correction to Gibbs Free Energy= 0.213111
Sum of electronic and zero-point Energies= -774.397662
Sum of electronic and thermal Energies= -774.376202
Sum of electronic and thermal Enthalpies= -774.375257
Sum of electronic and thermal Free Energies= -774.449767
  
```

| Center Number | Atomic Number | Atomic Type | Coordinates (Angstroms) |           |           |
|---------------|---------------|-------------|-------------------------|-----------|-----------|
|               |               |             | X                       | Y         | Z         |
| 1             | 6             | 0           | 0.321098                | 0.570909  | -0.161858 |
| 2             | 6             | 0           | 0.104844                | 0.333853  | 1.189573  |
| 3             | 6             | 0           | 1.169761                | -0.000709 | 2.028006  |
| 4             | 6             | 0           | 2.470144                | -0.111225 | 1.543710  |
| 5             | 6             | 0           | 2.691924                | 0.129002  | 0.183246  |
| 6             | 6             | 0           | 1.629653                | 0.461126  | -0.658989 |
| 7             | 1             | 0           | -0.481660               | 0.825775  | -0.847659 |
| 8             | 1             | 0           | 3.291910                | -0.370935 | 2.205034  |
| 9             | 1             | 0           | 3.697377                | 0.052630  | -0.218481 |
| 10            | 1             | 0           | 1.811030                | 0.633296  | -1.715987 |
| 11            | 7             | 0           | 0.778749                | -0.186248 | 3.415625  |
| 12            | 6             | 0           | 1.515383                | 0.567086  | 4.443313  |
| 13            | 1             | 0           | 1.639374                | 1.598480  | 4.109317  |
| 14            | 1             | 0           | 0.944627                | 0.557807  | 5.375683  |
| 15            | 1             | 0           | 2.501891                | 0.127095  | 4.633933  |
| 16            | 6             | 0           | 0.146482                | -1.373217 | 3.798447  |
| 17            | 6             | 0           | -0.160641               | -2.444419 | 3.026579  |
| 18            | 1             | 0           | 0.193265                | -2.567280 | 2.010118  |
| 19            | 46            | 0           | -1.468352               | 0.268534  | 2.449099  |
| 20            | 15            | 0           | -2.863921               | 1.338258  | 0.880068  |
| 21            | 1             | 0           | -3.059880               | 0.663628  | -0.358541 |
| 22            | 1             | 0           | -4.206712               | 1.601053  | 1.274161  |
| 23            | 1             | 0           | -2.440067               | 2.623932  | 0.439625  |
| 24            | 15            | 0           | -3.167640               | -0.171006 | 4.307814  |
| 25            | 1             | 0           | -4.573662               | -0.066230 | 4.079961  |
| 26            | 1             | 0           | -3.061591               | -1.518237 | 4.774453  |
| 27            | 1             | 0           | -3.078569               | 0.545622  | 5.540195  |
| 28            | 1             | 0           | -0.153554               | -1.387259 | 4.844178  |
| 29            | 6             | 0           | -1.003864               | -3.495147 | 3.624178  |
| 30            | 8             | 0           | -1.628677               | -3.377314 | 4.671336  |
| 31            | 8             | 0           | -1.013109               | -4.602579 | 2.867087  |
| 32            | 6             | 0           | -1.794018               | -5.705272 | 3.369958  |
| 33            | 1             | 0           | -2.843155               | -5.415827 | 3.469917  |
| 34            | 1             | 0           | -1.681353               | -6.498657 | 2.632024  |
| 35            | 1             | 0           | -1.414899               | -6.025586 | 4.343154  |

**B**

```

Zero-point correction=          0.266502 (Hartree/Particle)
Thermal correction to Energy=    0.288309
Thermal correction to Enthalpy=   0.289253
Thermal correction to Gibbs Free Energy= 0.214341
Sum of electronic and zero-point Energies= -774.434925
Sum of electronic and thermal Energies= -774.413119
Sum of electronic and thermal Enthalpies= -774.412175
Sum of electronic and thermal Free Energies= -774.487087

```

| Center<br>Number | Atomic<br>Number | Atomic<br>Type | Coordinates (Angstroms) |           |           |
|------------------|------------------|----------------|-------------------------|-----------|-----------|
|                  |                  |                | X                       | Y         | Z         |
| 1                | 6                | 0              | 0.908021                | -0.298477 | -2.216977 |
| 2                | 6                | 0              | 0.853724                | -0.136242 | -0.832052 |
| 3                | 6                | 0              | 2.078644                | -0.025447 | -0.135392 |
| 4                | 6                | 0              | 3.300887                | -0.003650 | -0.815187 |
| 5                | 6                | 0              | 3.323213                | -0.113761 | -2.205615 |
| 6                | 6                | 0              | 2.129423                | -0.272537 | -2.905249 |
| 7                | 1                | 0              | -0.007021               | -0.434101 | -2.786684 |
| 8                | 1                | 0              | 4.234481                | 0.062234  | -0.265043 |
| 9                | 1                | 0              | 4.272455                | -0.096149 | -2.731341 |
| 10               | 1                | 0              | 2.138357                | -0.367844 | -3.987162 |
| 11               | 7                | 0              | 2.058255                | 0.046828  | 1.297644  |
| 12               | 6                | 0              | 2.976298                | 0.961826  | 1.990597  |
| 13               | 1                | 0              | 2.938713                | 1.945242  | 1.515458  |
| 14               | 1                | 0              | 2.678505                | 1.043057  | 3.037129  |
| 15               | 1                | 0              | 4.000304                | 0.580459  | 1.947997  |
| 16               | 6                | 0              | 1.142207                | -0.638742 | 1.959720  |
| 17               | 6                | 0              | 0.285286                | -1.623333 | 1.381674  |
| 18               | 1                | 0              | 0.703941                | -2.217567 | 0.571193  |
| 19               | 46               | 0              | -0.899856               | -0.193667 | 0.241560  |
| 20               | 15               | 0              | -1.807046               | 1.573077  | -1.218232 |
| 21               | 1                | 0              | -1.875190               | 1.288191  | -2.615186 |
| 22               | 1                | 0              | -3.115573               | 2.111931  | -1.016257 |
| 23               | 1                | 0              | -1.049806               | 2.781496  | -1.255261 |
| 24               | 15               | 0              | -2.960936               | -0.281530 | 1.717887  |
| 25               | 1                | 0              | -2.832527               | 0.285422  | 3.020104  |
| 26               | 1                | 0              | -4.161239               | 0.367984  | 1.290674  |
| 27               | 1                | 0              | -3.499477               | -1.555100 | 2.068439  |
| 28               | 1                | 0              | 1.043630                | -0.428504 | 3.022565  |
| 29               | 6                | 0              | -0.514045               | -2.403162 | 2.370614  |
| 30               | 8                | 0              | -0.877034               | -1.980656 | 3.456127  |
| 31               | 8                | 0              | -0.787092               | -3.630979 | 1.906794  |
| 32               | 6                | 0              | -1.520006               | -4.498625 | 2.798691  |
| 33               | 1                | 0              | -1.625204               | -5.440129 | 2.261551  |
| 34               | 1                | 0              | -0.964036               | -4.641361 | 3.727853  |
| 35               | 1                | 0              | -2.500292               | -4.073126 | 3.027667  |

**E**

```

Zero-point correction=          0.253494 (Hartree/Particle)
Thermal correction to Energy=    0.274805
Thermal correction to Enthalpy=  0.275749
Thermal correction to Gibbs Free Energy=  0.202548
Sum of electronic and zero-point Energies= -774.018981
Sum of electronic and thermal Energies= -773.997671
Sum of electronic and thermal Enthalpies= -773.996727
Sum of electronic and thermal Free Energies= -774.069927

```

| Center Number | Atomic Number | Atomic Type | Coordinates (Angstroms) |           |           |
|---------------|---------------|-------------|-------------------------|-----------|-----------|
|               |               |             | X                       | Y         | Z         |
| 1             | 6             | 0           | -1.526829               | 1.369537  | -1.449611 |
| 2             | 6             | 0           | -0.501574               | 1.113374  | -0.524585 |
| 3             | 6             | 0           | -0.306909               | 2.056973  | 0.509067  |
| 4             | 6             | 0           | -1.213335               | 3.126280  | 0.663649  |
| 5             | 6             | 0           | -2.253557               | 3.318561  | -0.241980 |
| 6             | 6             | 0           | -2.398292               | 2.455077  | -1.325482 |
| 7             | 1             | 0           | -1.655049               | 0.704255  | -2.300290 |
| 8             | 1             | 0           | -1.094864               | 3.836634  | 1.473921  |
| 9             | 1             | 0           | -2.930780               | 4.158015  | -0.107221 |
| 10            | 1             | 0           | -3.182764               | 2.613622  | -2.061373 |
| 11            | 7             | 0           | 0.826585                | 1.984634  | 1.349553  |
| 12            | 6             | 0           | 0.946985                | 2.900743  | 2.476048  |
| 13            | 1             | 0           | 0.076953                | 2.811553  | 3.134949  |
| 14            | 1             | 0           | 1.835769                | 2.637289  | 3.051229  |
| 15            | 1             | 0           | 1.035265                | 3.948544  | 2.155477  |
| 16            | 6             | 0           | 1.961944                | 1.334689  | 0.928034  |
| 17            | 6             | 0           | 2.054784                | 0.373277  | -0.026111 |
| 18            | 1             | 0           | 2.875423                | 1.682953  | 1.407016  |
| 19            | 15            | 0           | -1.776348               | -1.892548 | -0.998056 |
| 20            | 1             | 0           | -2.464067               | -1.810214 | -2.257140 |
| 21            | 1             | 0           | -1.952754               | -3.306099 | -0.794441 |
| 22            | 1             | 0           | -2.855881               | -1.448202 | -0.169111 |
| 23            | 15            | 0           | 1.675641                | -2.906007 | -0.547898 |
| 24            | 1             | 0           | 2.850492                | -2.993340 | 0.263358  |
| 25            | 1             | 0           | 1.028904                | -4.099163 | -0.064305 |
| 26            | 1             | 0           | 2.217961                | -3.472652 | -1.748243 |
| 27            | 46            | 0           | 0.435352                | -0.691057 | -0.601969 |
| 28            | 6             | 0           | 3.432677                | 0.069161  | -0.432126 |
| 29            | 8             | 0           | 4.457914                | 0.538928  | 0.044386  |
| 30            | 8             | 0           | 3.504815                | -0.829030 | -1.473072 |
| 31            | 6             | 0           | 4.830762                | -1.097054 | -1.940052 |
| 32            | 1             | 0           | 5.442957                | -1.552360 | -1.154966 |
| 33            | 1             | 0           | 4.715007                | -1.784361 | -2.780719 |
| 34            | 1             | 0           | 5.319856                | -0.175711 | -2.267989 |

**TS E-to-D**

```

Zero-point correction=          0.250640 (Hartree/Particle)
Thermal correction to Energy=    0.272426
Thermal correction to Enthalpy=  0.273370
Thermal correction to Gibbs Free Energy=  0.197580
Sum of electronic and zero-point Energies= -774.007462
Sum of electronic and thermal Energies= -773.985676
Sum of electronic and thermal Enthalpies= -773.984732
Sum of electronic and thermal Free Energies= -774.060521
  
```

| Center Number | Atomic Number | Atomic Type | Coordinates (Angstroms) |           |           |
|---------------|---------------|-------------|-------------------------|-----------|-----------|
|               |               |             | X                       | Y         | Z         |
| 1             | 6             | 0           | 1.180593                | 1.491601  | -1.240696 |
| 2             | 6             | 0           | 0.914876                | 0.267793  | -0.593003 |
| 3             | 6             | 0           | 1.975716                | -0.331308 | 0.133421  |
| 4             | 6             | 0           | 3.171138                | 0.363209  | 0.379538  |
| 5             | 6             | 0           | 3.367329                | 1.614031  | -0.199835 |
| 6             | 6             | 0           | 2.389266                | 2.159419  | -1.042506 |
| 7             | 1             | 0           | 0.418313                | 1.940489  | -1.871915 |
| 8             | 1             | 0           | 3.960368                | -0.086967 | 0.974446  |
| 9             | 1             | 0           | 4.299522                | 2.145085  | -0.027232 |
| 10            | 1             | 0           | 2.562676                | 3.116665  | -1.528520 |
| 11            | 7             | 0           | 1.813127                | -1.691680 | 0.415699  |
| 12            | 6             | 0           | 2.820875                | -2.457990 | 1.127175  |
| 13            | 1             | 0           | 2.964967                | -2.061566 | 2.138197  |
| 14            | 1             | 0           | 2.484941                | -3.493292 | 1.208716  |
| 15            | 1             | 0           | 3.786127                | -2.439614 | 0.603820  |
| 16            | 6             | 0           | 0.850936                | -2.297607 | -0.345832 |
| 17            | 6             | 0           | -0.063362               | -1.535012 | -1.025724 |
| 18            | 1             | 0           | 0.935205                | -3.371716 | -0.484965 |
| 19            | 46            | 0           | -1.058320               | -0.009772 | -0.053762 |
| 20            | 15            | 0           | -1.419550               | 2.126935  | 1.260113  |
| 21            | 1             | 0           | -1.571778               | 3.356953  | 0.528239  |
| 22            | 1             | 0           | -2.428384               | 2.410690  | 2.252611  |
| 23            | 1             | 0           | -0.293877               | 2.545633  | 2.047758  |
| 24            | 15            | 0           | -3.417040               | -0.949535 | 0.042569  |
| 25            | 1             | 0           | -3.575474               | -2.299431 | -0.423221 |
| 26            | 1             | 0           | -4.214522               | -1.093780 | 1.235225  |
| 27            | 1             | 0           | -4.456265               | -0.372231 | -0.769422 |
| 28            | 6             | 0           | -0.728920               | -2.185449 | -2.163369 |
| 29            | 8             | 0           | -0.539087               | -3.331854 | -2.546129 |
| 30            | 8             | 0           | -1.616992               | -1.363240 | -2.803012 |
| 31            | 6             | 0           | -2.226623               | -1.929705 | -3.967522 |
| 32            | 1             | 0           | -2.857109               | -1.141446 | -4.382879 |
| 33            | 1             | 0           | -1.468646               | -2.234447 | -4.694934 |
| 34            | 1             | 0           | -2.830247               | -2.805679 | -3.709605 |

**System with internal CO<sub>2</sub>Me on enamine:**

**A**

Zero-point correction= 0.266540 (Hartree/Particle)  
 Thermal correction to Energy= 0.288017  
 Thermal correction to Enthalpy= 0.288962  
 Thermal correction to Gibbs Free Energy= 0.215323  
 Sum of electronic and zero-point Energies= -774.403370  
 Sum of electronic and thermal Energies= -774.381893  
 Sum of electronic and thermal Enthalpies= -774.380949  
 Sum of electronic and thermal Free Energies= -774.454588

| Center Number | Atomic Number | Atomic Type | Coordinates (Angstroms) |           |           |
|---------------|---------------|-------------|-------------------------|-----------|-----------|
|               |               |             | X                       | Y         | Z         |
| 1             | 6             | 0           | 1.117188                | 0.481918  | -2.409994 |
| 2             | 6             | 0           | 0.778782                | 0.165158  | -1.097620 |
| 3             | 6             | 0           | 1.759223                | -0.241102 | -0.205459 |
| 4             | 6             | 0           | 3.105402                | -0.329674 | -0.547759 |
| 5             | 6             | 0           | 3.445491                | -0.014623 | -1.868542 |
| 6             | 6             | 0           | 2.464356                | 0.377592  | -2.785486 |
| 7             | 1             | 0           | 0.385022                | 0.809049  | -3.142332 |
| 8             | 1             | 0           | 3.865116                | -0.631363 | 0.167273  |
| 9             | 1             | 0           | 4.482770                | -0.074295 | -2.183213 |
| 10            | 1             | 0           | 2.751175                | 0.615741  | -3.805905 |
| 11            | 7             | 0           | 1.145444                | -0.485893 | 1.117150  |
| 12            | 6             | 0           | 1.705930                | 0.428739  | 2.160981  |
| 13            | 1             | 0           | 1.691135                | 1.445438  | 1.767215  |
| 14            | 1             | 0           | 1.095356                | 0.371456  | 3.059850  |
| 15            | 1             | 0           | 2.738836                | 0.146093  | 2.394603  |
| 16            | 6             | 0           | 1.121081                | -1.880524 | 1.526567  |
| 17            | 6             | 0           | 1.615223                | -2.889832 | 0.797080  |
| 18            | 1             | 0           | 1.527621                | -3.904368 | 1.163924  |
| 19            | 1             | 0           | 2.089775                | -2.739679 | -0.164468 |
| 20            | 46            | 0           | -0.774972               | 0.220147  | 0.170176  |
| 21            | 15            | 0           | -2.344902               | 0.947582  | -1.464740 |
| 22            | 1             | 0           | -3.510896               | 0.144661  | -1.635126 |
| 23            | 1             | 0           | -2.932954               | 2.231604  | -1.267933 |
| 24            | 1             | 0           | -1.898415               | 1.060500  | -2.811649 |
| 25            | 15            | 0           | -2.445978               | 0.345510  | 2.093989  |
| 26            | 1             | 0           | -3.656183               | 1.094411  | 1.935822  |
| 27            | 1             | 0           | -2.988986               | -0.865638 | 2.610664  |
| 28            | 1             | 0           | -1.966957               | 0.934004  | 3.299078  |
| 29            | 6             | 0           | 0.395957                | -2.158166 | 2.812642  |
| 30            | 8             | 0           | -0.397033               | -1.387249 | 3.328811  |
| 31            | 8             | 0           | 0.707322                | -3.351586 | 3.318815  |
| 32            | 6             | 0           | 0.016140                | -3.734632 | 4.529396  |
| 33            | 1             | 0           | 0.424999                | -4.708370 | 4.794243  |
| 34            | 1             | 0           | 0.207653                | -3.004169 | 5.318069  |
| 35            | 1             | 0           | -1.058485               | -3.802761 | 4.344935  |

**TS A-to-B**

Zero-point correction= 0.264998 (Hartree/Particle)  
 Thermal correction to Energy= 0.286304  
 Thermal correction to Enthalpy= 0.287248  
 Thermal correction to Gibbs Free Energy= 0.213585  
 Sum of electronic and zero-point Energies= -774.384101  
 Sum of electronic and thermal Energies= -774.362795  
 Sum of electronic and thermal Enthalpies= -774.361851  
 Sum of electronic and thermal Free Energies= -774.435514

| Center Number | Atomic Number | Atomic Type | Coordinates (Angstroms) |           |           |
|---------------|---------------|-------------|-------------------------|-----------|-----------|
|               |               |             | X                       | Y         | Z         |
| 1             | 6             | 0           | 0.226725                | 0.365334  | -0.118339 |
| 2             | 6             | 0           | 0.011827                | 0.206994  | 1.243974  |
| 3             | 6             | 0           | 1.083942                | -0.015933 | 2.117809  |
| 4             | 6             | 0           | 2.389606                | -0.061565 | 1.630438  |
| 5             | 6             | 0           | 2.613468                | 0.121854  | 0.261241  |
| 6             | 6             | 0           | 1.542745                | 0.320474  | -0.607757 |
| 7             | 1             | 0           | -0.586875               | 0.510483  | -0.823174 |
| 8             | 1             | 0           | 3.222807                | -0.235623 | 2.304737  |
| 9             | 1             | 0           | 3.628022                | 0.095683  | -0.124025 |
| 10            | 1             | 0           | 1.718551                | 0.439579  | -1.672853 |
| 11            | 7             | 0           | 0.724640                | -0.193237 | 3.504416  |
| 12            | 6             | 0           | 1.626619                | 0.409664  | 4.502639  |
| 13            | 1             | 0           | 1.933956                | 1.390192  | 4.135756  |
| 14            | 1             | 0           | 1.092797                | 0.542354  | 5.443288  |
| 15            | 1             | 0           | 2.519947                | -0.205648 | 4.675031  |
| 16            | 6             | 0           | 0.092097                | -1.424612 | 3.831843  |
| 17            | 6             | 0           | -0.157656               | -2.439142 | 2.970955  |
| 18            | 1             | 0           | 0.182292                | -2.431474 | 1.942948  |
| 19            | 46            | 0           | -1.615619               | 0.187244  | 2.437231  |
| 20            | 15            | 0           | -2.768974               | 1.500233  | 0.849363  |
| 21            | 1             | 0           | -3.013828               | 0.897312  | -0.417384 |
| 22            | 1             | 0           | -4.073996               | 1.950737  | 1.200640  |
| 23            | 1             | 0           | -2.140490               | 2.718548  | 0.467084  |
| 24            | 15            | 0           | -3.461717               | 0.172568  | 4.209559  |
| 25            | 1             | 0           | -4.803599               | 0.498939  | 3.835108  |
| 26            | 1             | 0           | -3.712313               | -1.035879 | 4.923289  |
| 27            | 1             | 0           | -3.293565               | 1.069401  | 5.304073  |
| 28            | 1             | 0           | -0.701127               | -3.309014 | 3.316890  |
| 29            | 6             | 0           | -0.424922               | -1.528843 | 5.251054  |
| 30            | 8             | 0           | -0.964286               | -0.611929 | 5.844935  |
| 31            | 8             | 0           | -0.238820               | -2.749012 | 5.751809  |
| 32            | 6             | 0           | -0.733689               | -2.971936 | 7.093641  |
| 33            | 1             | 0           | -0.455291               | -3.996852 | 7.332877  |
| 34            | 1             | 0           | -0.267376               | -2.267930 | 7.785695  |
| 35            | 1             | 0           | -1.818731               | -2.847688 | 7.121927  |

**B**

```

Zero-point correction=          0.266043 (Hartree/Particle)
Thermal correction to Energy=    0.287827
Thermal correction to Enthalpy=  0.288771
Thermal correction to Gibbs Free Energy=  0.213582
Sum of electronic and zero-point Energies= -774.421496
Sum of electronic and thermal Energies= -774.399711
Sum of electronic and thermal Enthalpies= -774.398767
Sum of electronic and thermal Free Energies= -774.473956

```

| Center<br>Number | Atomic<br>Number | Atomic<br>Type | Coordinates (Angstroms) |           |           |
|------------------|------------------|----------------|-------------------------|-----------|-----------|
|                  |                  |                | X                       | Y         | Z         |
| 1                | 6                | 0              | -3.010860               | 0.116646  | -0.519017 |
| 2                | 6                | 0              | -1.675041               | 0.354817  | -0.185525 |
| 3                | 6                | 0              | -1.281641               | 1.698162  | 0.005425  |
| 4                | 6                | 0              | -2.208742               | 2.746302  | -0.079275 |
| 5                | 6                | 0              | -3.544323               | 2.472932  | -0.367230 |
| 6                | 6                | 0              | -3.945622               | 1.157692  | -0.591210 |
| 7                | 1                | 0              | -3.348840               | -0.896725 | -0.715717 |
| 8                | 1                | 0              | -1.882684               | 3.775066  | 0.038453  |
| 9                | 1                | 0              | -4.257915               | 3.287862  | -0.434073 |
| 10               | 1                | 0              | -4.984174               | 0.933438  | -0.816797 |
| 11               | 7                | 0              | 0.091060                | 2.015111  | 0.285374  |
| 12               | 6                | 0              | 0.358055                | 3.062779  | 1.296878  |
| 13               | 1                | 0              | -0.510903               | 3.117601  | 1.950974  |
| 14               | 1                | 0              | 1.240599                | 2.812010  | 1.881507  |
| 15               | 1                | 0              | 0.528705                | 4.027741  | 0.813672  |
| 16               | 6                | 0              | 1.035333                | 1.305327  | -0.322470 |
| 17               | 6                | 0              | 0.745393                | 0.333466  | -1.342039 |
| 18               | 1                | 0              | 1.632136                | -0.071138 | -1.819515 |
| 19               | 1                | 0              | -0.023305               | 0.634838  | -2.055597 |
| 20               | 46               | 0              | -0.275756               | -1.143938 | -0.204123 |
| 21               | 15               | 0              | -1.674155               | -2.533403 | 1.318973  |
| 22               | 1                | 0              | -3.027458               | -2.781465 | 0.934688  |
| 23               | 1                | 0              | -1.301261               | -3.857077 | 1.713743  |
| 24               | 1                | 0              | -1.901448               | -1.965776 | 2.609231  |
| 25               | 15               | 0              | 1.553347                | -2.863045 | -0.456338 |
| 26               | 1                | 0              | 2.380563                | -3.170666 | 0.669647  |
| 27               | 1                | 0              | 1.225557                | -4.196917 | -0.855673 |
| 28               | 1                | 0              | 2.578019                | -2.591412 | -1.414759 |
| 29               | 6                | 0              | 2.486798                | 1.588913  | 0.014515  |
| 30               | 8                | 0              | 2.920961                | 2.707464  | 0.171492  |
| 31               | 8                | 0              | 3.210518                | 0.465616  | 0.052305  |
| 32               | 6                | 0              | 4.632246                | 0.655517  | 0.282314  |
| 33               | 1                | 0              | 5.056444                | -0.347027 | 0.292802  |
| 34               | 1                | 0              | 5.061921                | 1.254411  | -0.523074 |
| 35               | 1                | 0              | 4.792126                | 1.157377  | 1.238437  |

**System with internal methyl group and terminal CO<sub>2</sub>Me group on the enamine:**

**A**

Zero-point correction= 0.294122 (Hartree/Particle)  
 Thermal correction to Energy= 0.317628  
 Thermal correction to Enthalpy= 0.318572  
 Thermal correction to Gibbs Free Energy= 0.238311  
 Sum of electronic and zero-point Energies= -813.690035  
 Sum of electronic and thermal Energies= -813.666529  
 Sum of electronic and thermal Enthalpies= -813.665584  
 Sum of electronic and thermal Free Energies= -813.745845

| Center Number | Atomic Number | Atomic Type | Coordinates (Angstroms) |           |           |
|---------------|---------------|-------------|-------------------------|-----------|-----------|
|               |               |             | X                       | Y         | Z         |
| 1             | 6             | 0           | 1.181019                | 0.342899  | -2.360793 |
| 2             | 6             | 0           | 0.832064                | 0.117157  | -1.032831 |
| 3             | 6             | 0           | 1.783232                | -0.316743 | -0.123980 |
| 4             | 6             | 0           | 3.112558                | -0.541478 | -0.467374 |
| 5             | 6             | 0           | 3.466089                | -0.316144 | -1.802250 |
| 6             | 6             | 0           | 2.514453                | 0.117663  | -2.732191 |
| 7             | 1             | 0           | 0.470988                | 0.686672  | -3.106777 |
| 8             | 1             | 0           | 3.844740                | -0.884873 | 0.257482  |
| 9             | 1             | 0           | 4.491284                | -0.479593 | -2.119519 |
| 10            | 1             | 0           | 2.813236                | 0.286954  | -3.762830 |
| 11            | 7             | 0           | 1.169541                | -0.422461 | 1.218456  |
| 12            | 6             | 0           | 1.723622                | 0.618467  | 2.134943  |
| 13            | 1             | 0           | 1.751635                | 1.564791  | 1.595210  |
| 14            | 1             | 0           | 1.093612                | 0.727821  | 3.016813  |
| 15            | 1             | 0           | 2.739973                | 0.352037  | 2.447377  |
| 16            | 6             | 0           | 1.053333                | -1.756423 | 1.794007  |
| 17            | 6             | 0           | 1.237673                | -2.843129 | 1.016553  |
| 18            | 1             | 0           | 1.518786                | -2.730523 | -0.022861 |
| 19            | 46            | 0           | -0.740873               | 0.203865  | 0.209288  |
| 20            | 15            | 0           | -2.289627               | 0.866946  | -1.480602 |
| 21            | 1             | 0           | -3.378768               | -0.016776 | -1.738335 |
| 22            | 1             | 0           | -2.985899               | 2.093816  | -1.272480 |
| 23            | 1             | 0           | -1.786642               | 1.063278  | -2.797206 |
| 24            | 15            | 0           | -2.483721               | 0.169384  | 2.089880  |
| 25            | 1             | 0           | -3.798130               | 0.685259  | 1.862855  |
| 26            | 1             | 0           | -2.837903               | -1.103991 | 2.632851  |
| 27            | 1             | 0           | -2.190503               | 0.864298  | 3.304167  |
| 28            | 6             | 0           | 1.076143                | -4.252641 | 1.452316  |
| 29            | 8             | 0           | 0.699216                | -4.659451 | 2.536864  |
| 30            | 8             | 0           | 1.412714                | -5.066471 | 0.432126  |
| 31            | 6             | 0           | 1.315726                | -6.478336 | 0.702966  |
| 32            | 1             | 0           | 1.632482                | -6.971234 | -0.215612 |
| 33            | 1             | 0           | 1.969430                | -6.751468 | 1.534844  |
| 34            | 1             | 0           | 0.286600                | -6.748229 | 0.952656  |
| 35            | 6             | 0           | 0.691379                | -1.799412 | 3.253105  |
| 36            | 1             | 0           | 0.437753                | -2.821039 | 3.532350  |
| 37            | 1             | 0           | 1.529778                | -1.472106 | 3.879680  |
| 38            | 1             | 0           | -0.155583               | -1.140288 | 3.477482  |



**TS A-to-B**

Zero-point correction= 0.293579 (Hartree/Particle)  
 Thermal correction to Energy= 0.316325  
 Thermal correction to Enthalpy= 0.317270  
 Thermal correction to Gibbs Free Energy= 0.240271  
 Sum of electronic and zero-point Energies= -813.681369  
 Sum of electronic and thermal Energies= -813.658622  
 Sum of electronic and thermal Enthalpies= -813.657678  
 Sum of electronic and thermal Free Energies= -813.734676

| Center Number | Atomic Number | Atomic Type | Coordinates (Angstroms) |           |           |
|---------------|---------------|-------------|-------------------------|-----------|-----------|
|               |               |             | X                       | Y         | Z         |
| 1             | 6             | 0           | 2.744160                | -0.791698 | -1.333204 |
| 2             | 6             | 0           | 1.787127                | -0.494209 | -0.370367 |
| 3             | 6             | 0           | 1.349423                | -1.470656 | 0.522640  |
| 4             | 6             | 0           | 1.840996                | -2.773017 | 0.466733  |
| 5             | 6             | 0           | 2.803446                | -3.079517 | -0.500606 |
| 6             | 6             | 0           | 3.248663                | -2.100010 | -1.390238 |
| 7             | 1             | 0           | 3.104765                | -0.057746 | -2.048056 |
| 8             | 1             | 0           | 1.491523                | -3.529372 | 1.163998  |
| 9             | 1             | 0           | 3.205506                | -4.086103 | -0.558639 |
| 10            | 1             | 0           | 3.989995                | -2.350049 | -2.143709 |
| 11            | 7             | 0           | 0.391534                | -0.988547 | 1.510900  |
| 12            | 6             | 0           | 0.806988                | -1.205084 | 2.911703  |
| 13            | 1             | 0           | 1.883795                | -1.043940 | 2.972501  |
| 14            | 1             | 0           | 0.312943                | -0.496807 | 3.576146  |
| 15            | 1             | 0           | 0.580680                | -2.224738 | 3.248993  |
| 16            | 6             | 0           | -0.991187               | -0.937336 | 1.179194  |
| 17            | 6             | 0           | -1.420031               | -1.212481 | -0.087495 |
| 18            | 1             | 0           | -0.746863               | -1.666663 | -0.804268 |
| 19            | 46            | 0           | 0.600039                | 1.060015  | 0.090456  |
| 20            | 15            | 0           | 1.894956                | 2.527611  | -1.224743 |
| 21            | 1             | 0           | 1.872494                | 2.305866  | -2.631657 |
| 22            | 1             | 0           | 1.579526                | 3.914541  | -1.154141 |
| 23            | 1             | 0           | 3.294308                | 2.542088  | -0.963509 |
| 24            | 15            | 0           | -1.324699               | 2.644213  | 0.677877  |
| 25            | 1             | 0           | -1.509710               | 3.857895  | -0.052797 |
| 26            | 1             | 0           | -2.579920               | 2.000700  | 0.443686  |
| 27            | 1             | 0           | -1.524514               | 3.144281  | 2.000977  |
| 28            | 6             | 0           | -2.774592               | -0.928249 | -0.591352 |
| 29            | 8             | 0           | -3.586786               | -0.142465 | -0.116432 |
| 30            | 8             | 0           | -3.005649               | -1.628793 | -1.716594 |
| 31            | 6             | 0           | -4.292685               | -1.428695 | -2.332289 |
| 32            | 1             | 0           | -4.423295               | -0.381083 | -2.615258 |
| 33            | 1             | 0           | -4.293056               | -2.069038 | -3.213748 |
| 34            | 1             | 0           | -5.091970               | -1.716923 | -1.645495 |
| 35            | 6             | 0           | -1.912933               | -0.568199 | 2.313064  |
| 36            | 1             | 0           | -2.921884               | -0.412680 | 1.937465  |
| 37            | 1             | 0           | -1.932208               | -1.378949 | 3.051648  |
| 38            | 1             | 0           | -1.585283               | 0.335487  | 2.839094  |

**B**

```

Zero-point correction=          0.294951 (Hartree/Particle)
Thermal correction to Energy=    0.318050
Thermal correction to Enthalpy=  0.318994
Thermal correction to Gibbs Free Energy= 0.241926
Sum of electronic and zero-point Energies= -813.722558
Sum of electronic and thermal Energies= -813.699459
Sum of electronic and thermal Enthalpies= -813.698515
Sum of electronic and thermal Free Energies= -813.775583

```

| Center<br>Number | Atomic<br>Number | Atomic<br>Type | Coordinates (Angstroms) |           |           |
|------------------|------------------|----------------|-------------------------|-----------|-----------|
|                  |                  |                | X                       | Y         | Z         |
| 1                | 6                | 0              | 0.821507                | -0.335013 | -2.143500 |
| 2                | 6                | 0              | 0.805207                | -0.117228 | -0.764361 |
| 3                | 6                | 0              | 2.042290                | -0.079265 | -0.085607 |
| 4                | 6                | 0              | 3.248920                | -0.220728 | -0.781032 |
| 5                | 6                | 0              | 3.241028                | -0.389810 | -2.165440 |
| 6                | 6                | 0              | 2.027849                | -0.449517 | -2.847204 |
| 7                | 1                | 0              | -0.111512               | -0.413015 | -2.694473 |
| 8                | 1                | 0              | 4.192395                | -0.238148 | -0.243357 |
| 9                | 1                | 0              | 4.179935                | -0.495638 | -2.699398 |
| 10               | 1                | 0              | 2.011533                | -0.586624 | -3.924533 |
| 11               | 7                | 0              | 2.061135                | 0.076206  | 1.345360  |
| 12               | 6                | 0              | 2.978668                | 1.071381  | 1.929804  |
| 13               | 1                | 0              | 3.710273                | 1.355138  | 1.177354  |
| 14               | 1                | 0              | 2.426950                | 1.969532  | 2.228323  |
| 15               | 1                | 0              | 3.498497                | 0.661366  | 2.797798  |
| 16               | 6                | 0              | 1.135370                | -0.535938 | 2.091079  |
| 17               | 6                | 0              | 0.274919                | -1.523086 | 1.475074  |
| 18               | 1                | 0              | 0.754929                | -2.076744 | 0.671310  |
| 19               | 46               | 0              | -0.918841               | -0.094609 | 0.340881  |
| 20               | 15               | 0              | -1.808980               | 1.678285  | -1.122974 |
| 21               | 1                | 0              | -1.848125               | 1.406337  | -2.523733 |
| 22               | 1                | 0              | -3.123247               | 2.212016  | -0.943517 |
| 23               | 1                | 0              | -1.057538               | 2.891299  | -1.137222 |
| 24               | 15               | 0              | -2.980002               | -0.148636 | 1.820713  |
| 25               | 1                | 0              | -2.833020               | 0.298626  | 3.166382  |
| 26               | 1                | 0              | -4.122180               | 0.625536  | 1.441042  |
| 27               | 1                | 0              | -3.615279               | -1.402500 | 2.057685  |
| 28               | 6                | 0              | -0.568453               | -2.433737 | 2.307907  |
| 29               | 8                | 0              | -1.215634               | -2.139212 | 3.302116  |
| 30               | 8                | 0              | -0.554103               | -3.667151 | 1.779028  |
| 31               | 6                | 0              | -1.340915               | -4.665603 | 2.462948  |
| 32               | 1                | 0              | -1.182776               | -5.586882 | 1.904030  |
| 33               | 1                | 0              | -1.000956               | -4.774118 | 3.495133  |
| 34               | 1                | 0              | -2.397798               | -4.387859 | 2.457559  |
| 35               | 6                | 0              | 1.056209                | -0.190873 | 3.551375  |
| 36               | 1                | 0              | 0.168401                | -0.635016 | 3.996853  |
| 37               | 1                | 0              | 1.938284                | -0.586925 | 4.072150  |
| 38               | 1                | 0              | 1.045103                | 0.891933  | 3.710460  |



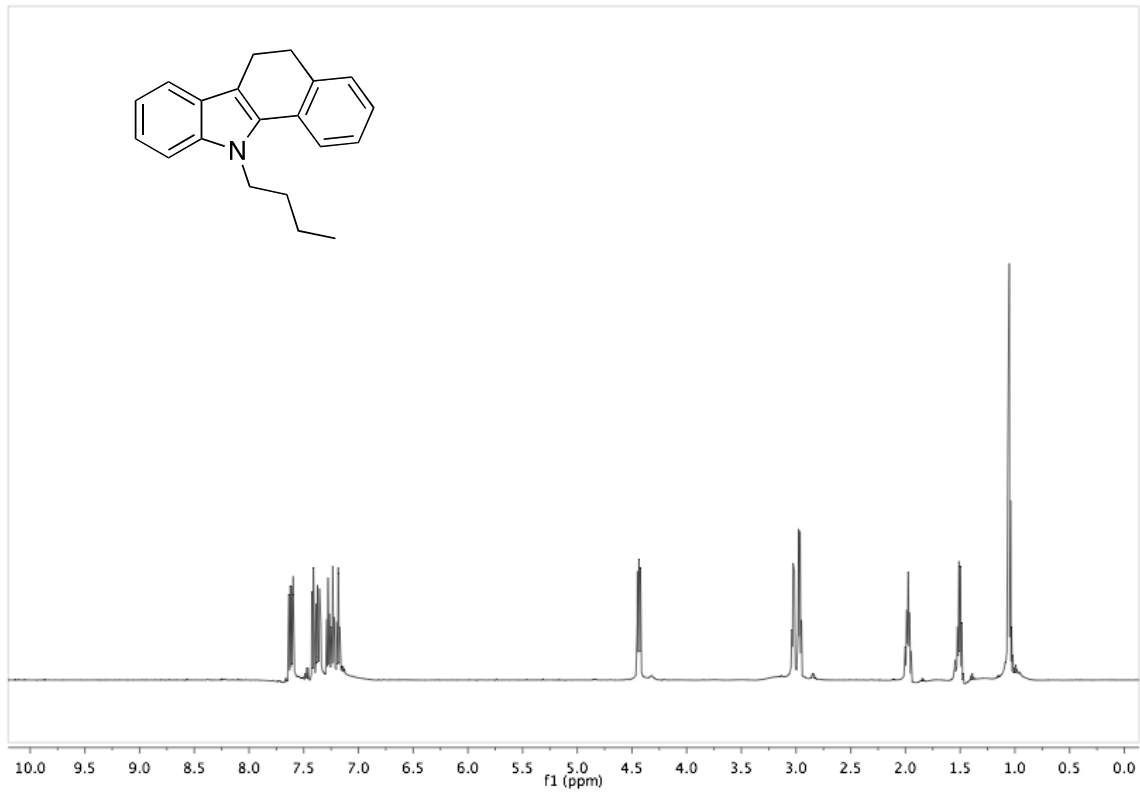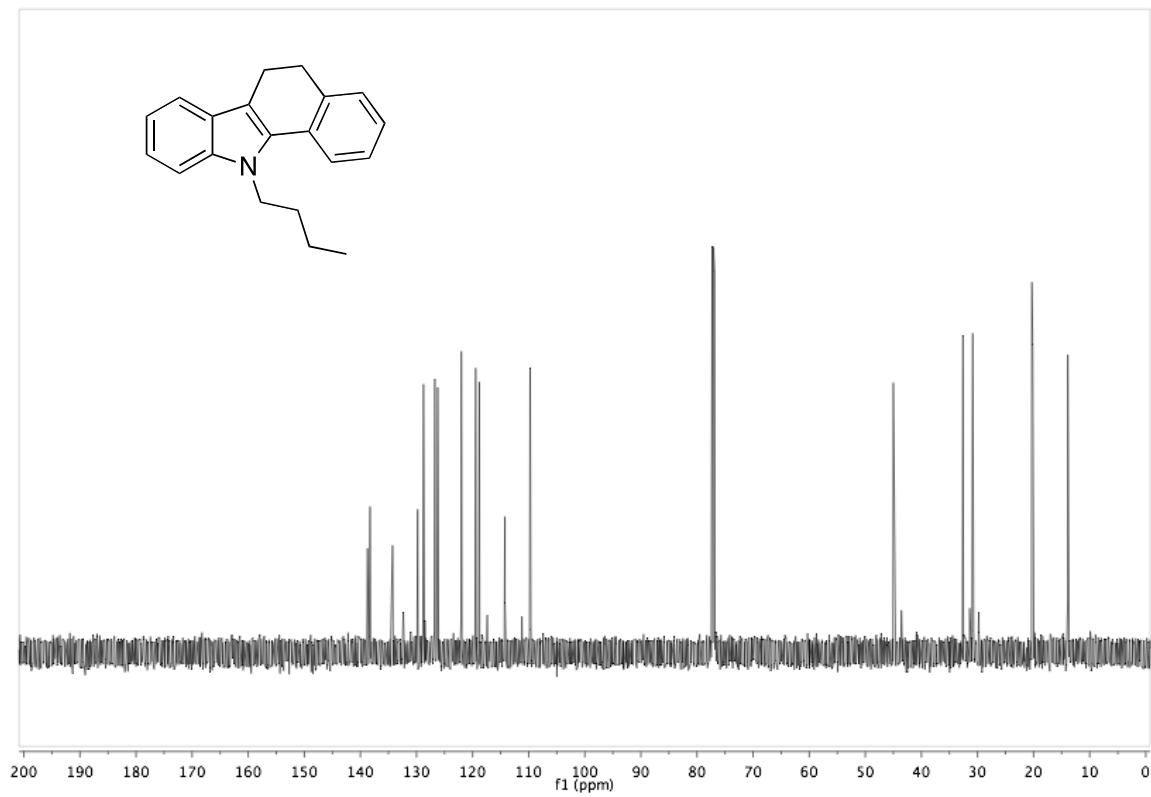

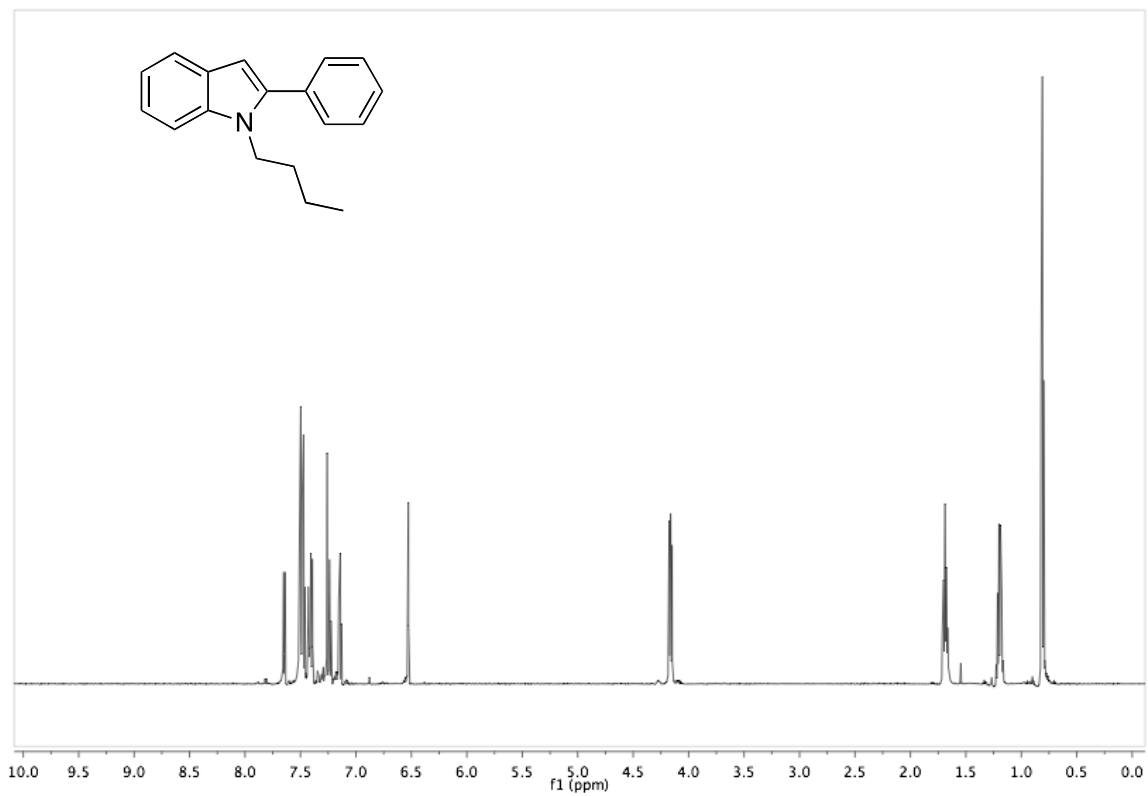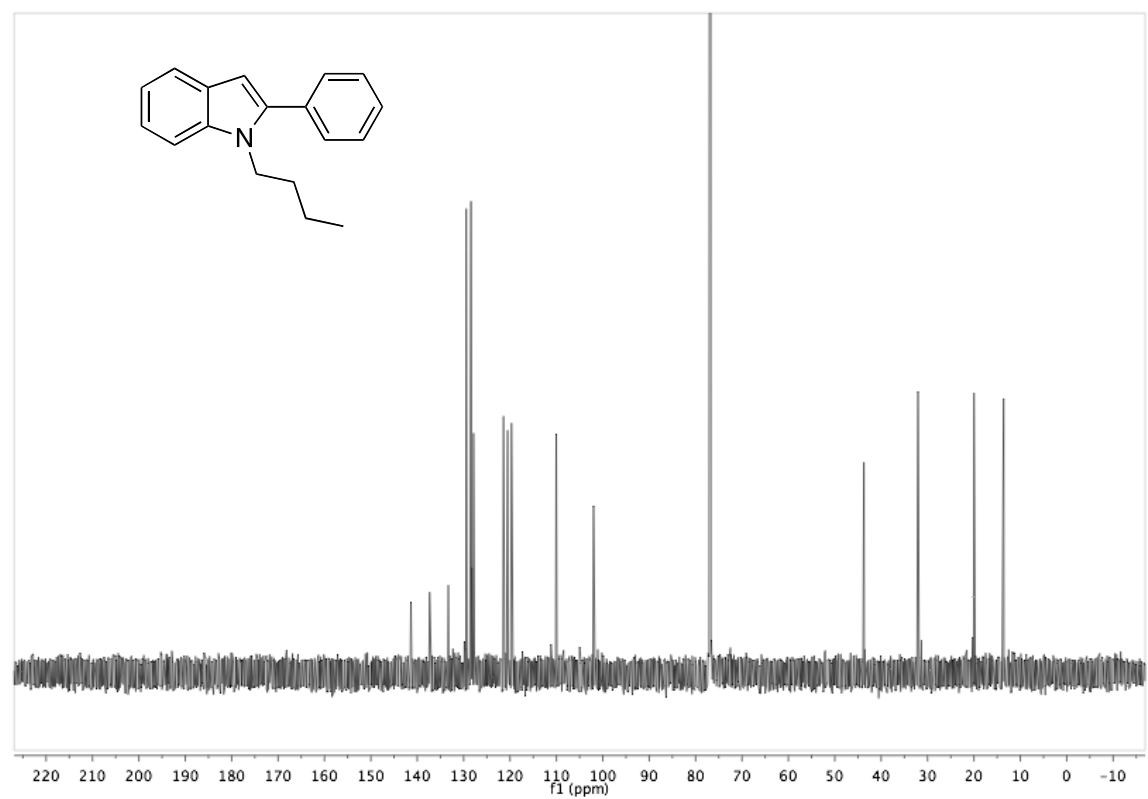

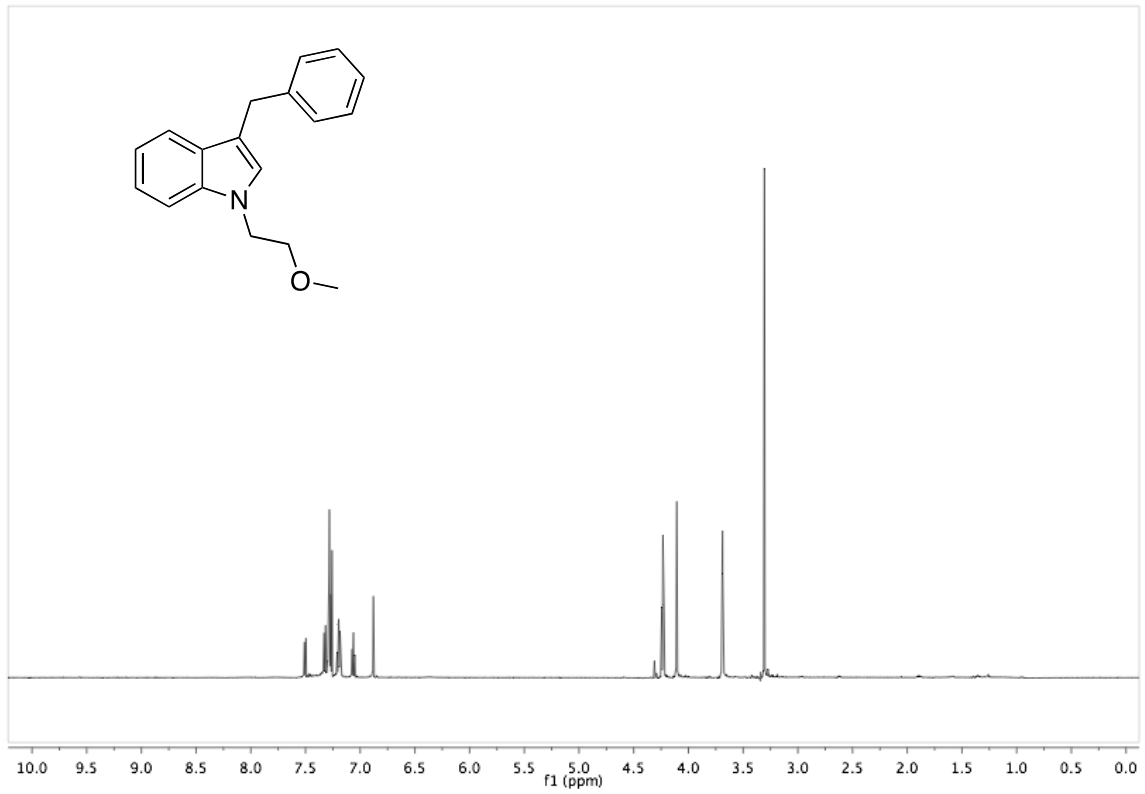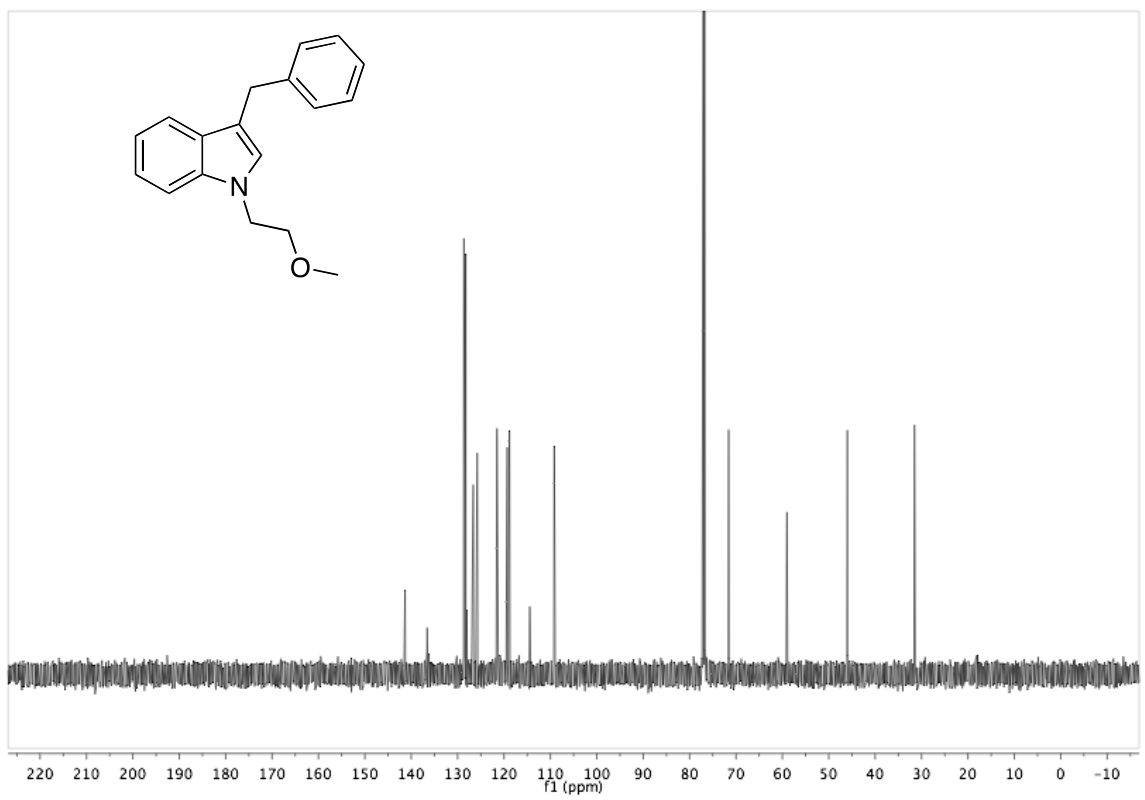

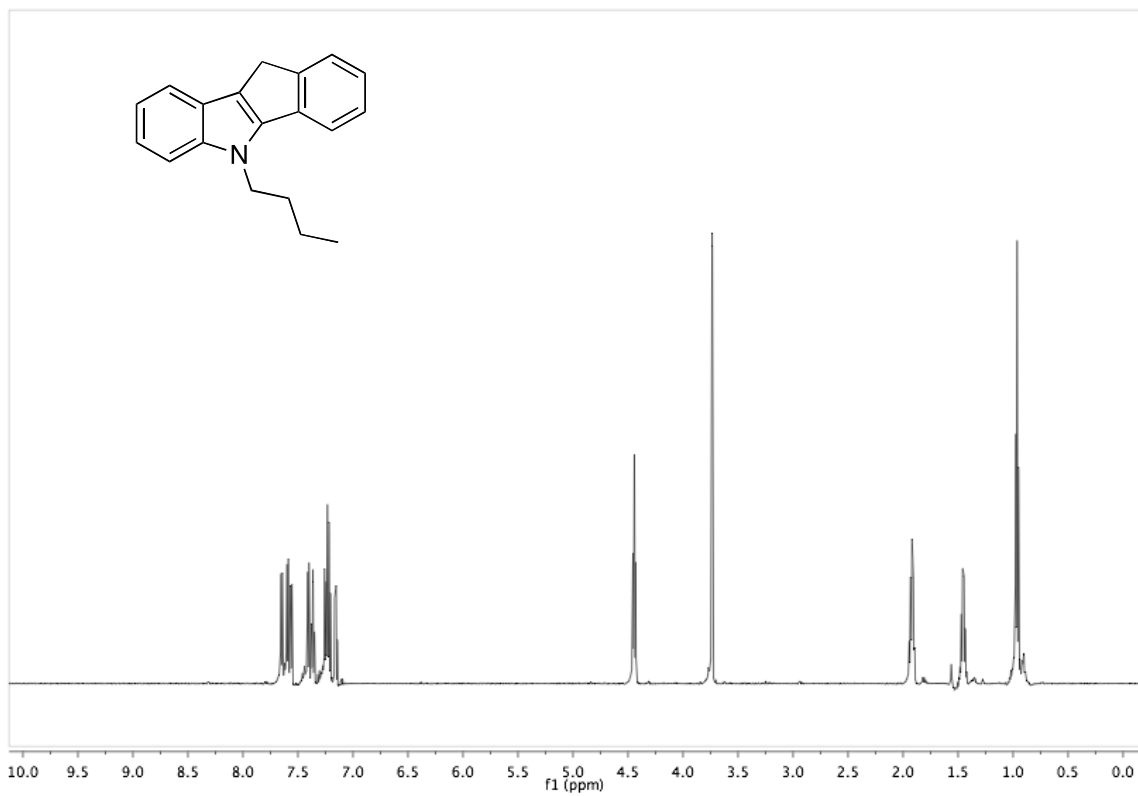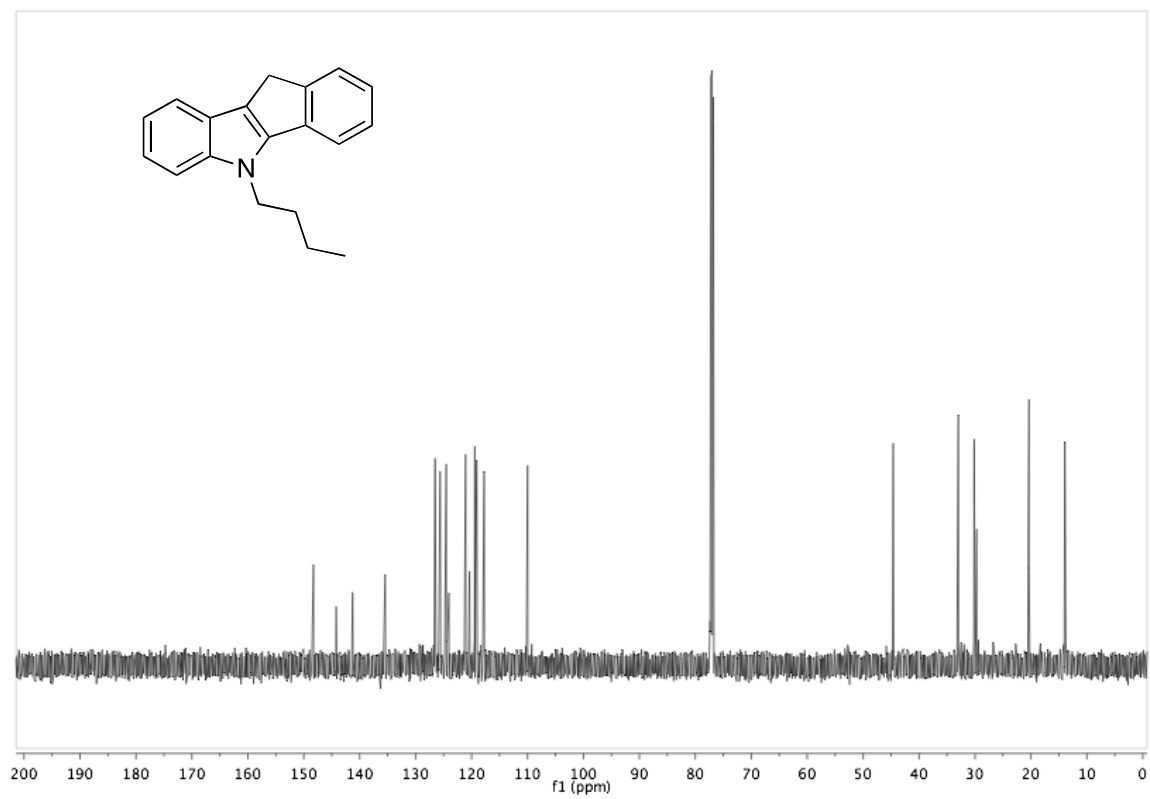

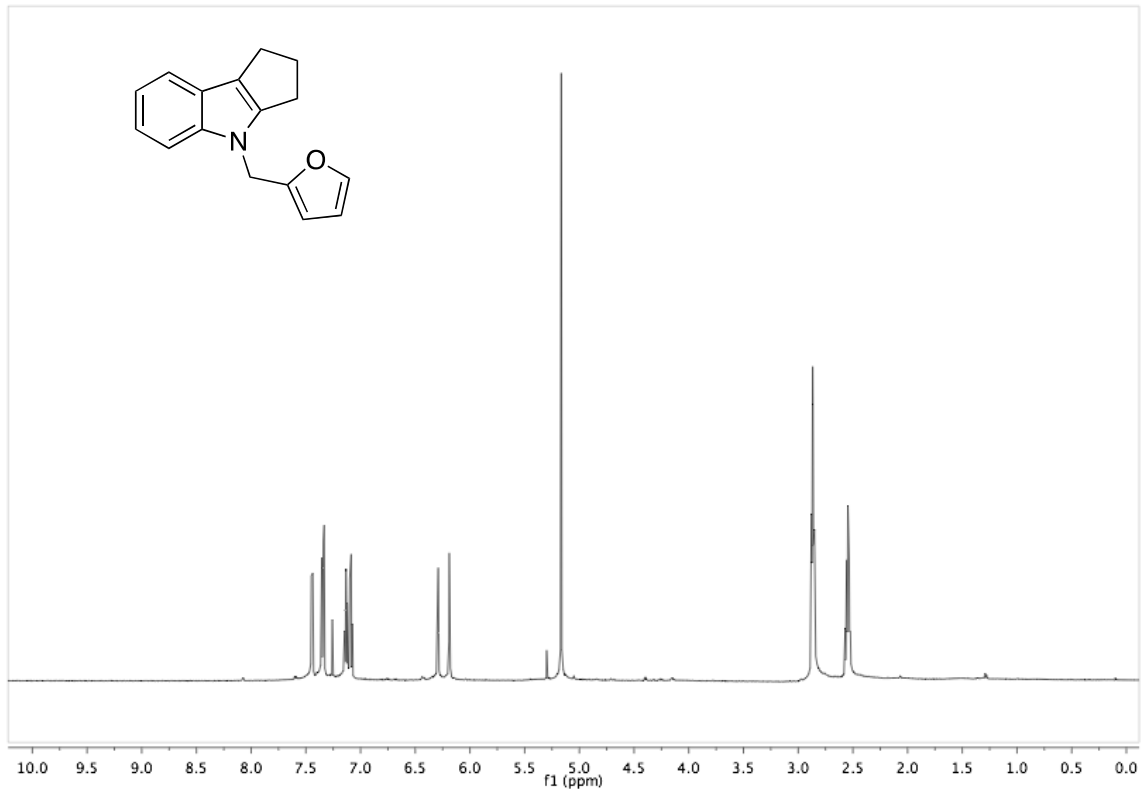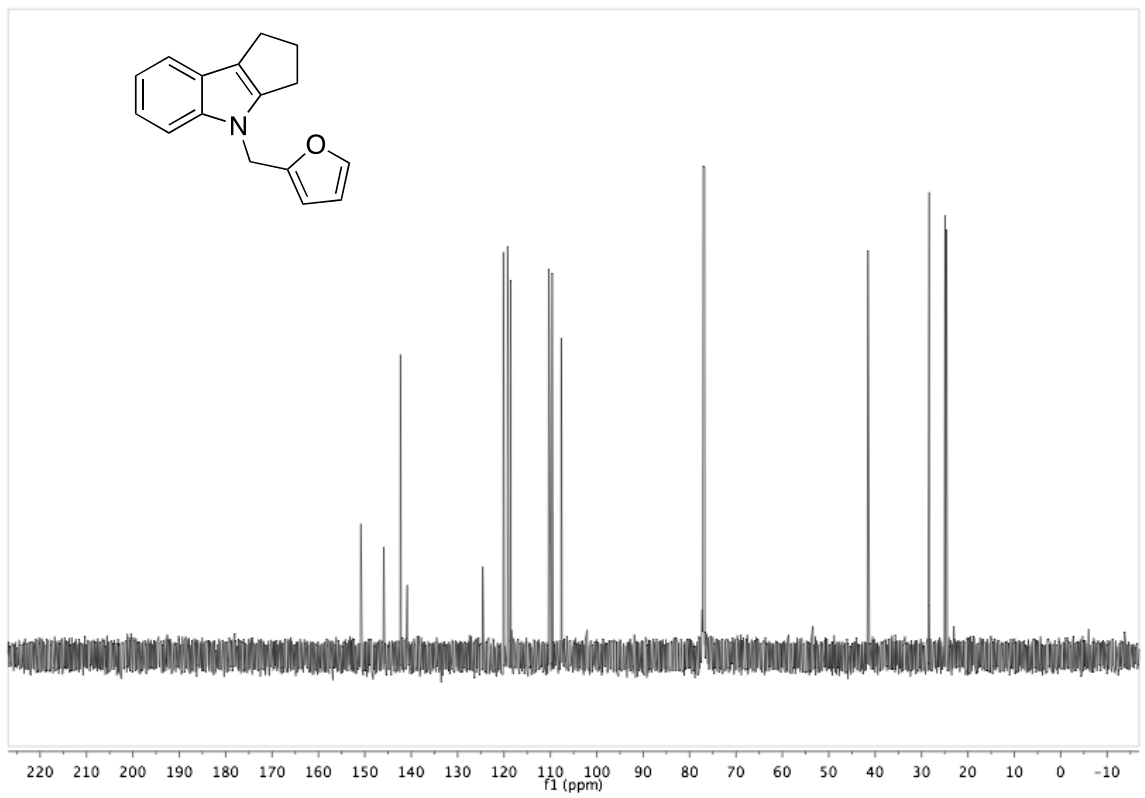



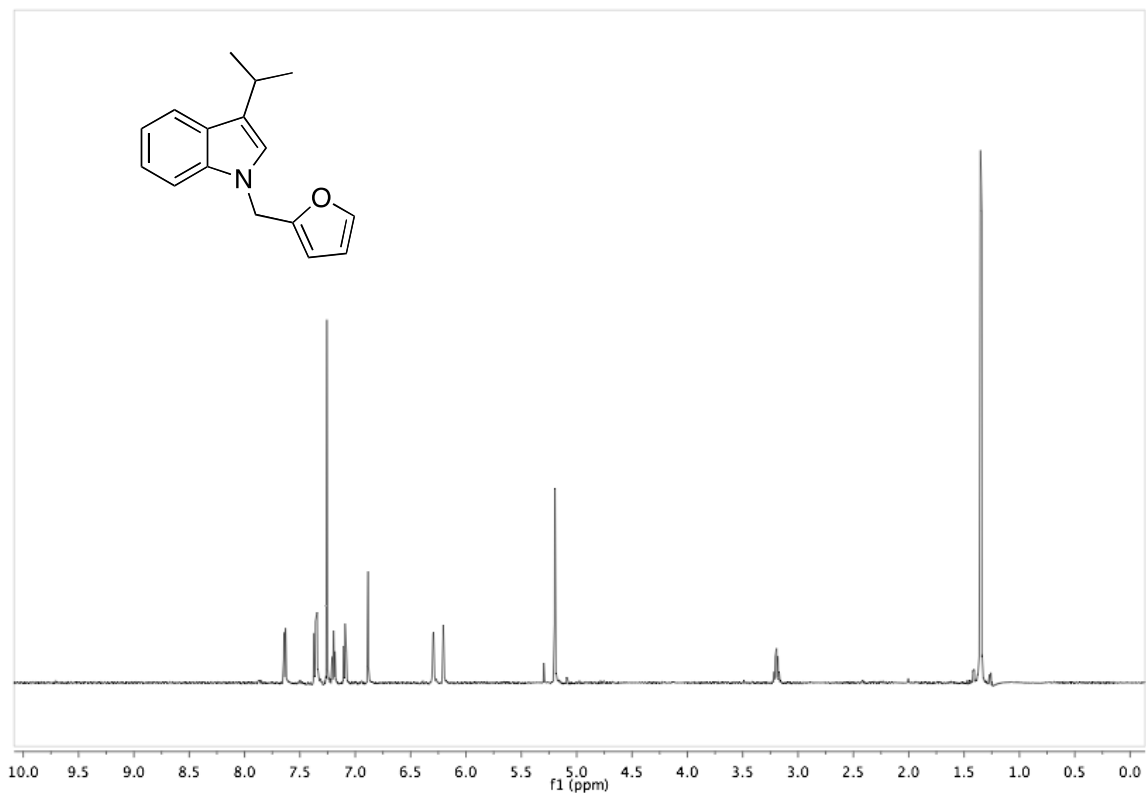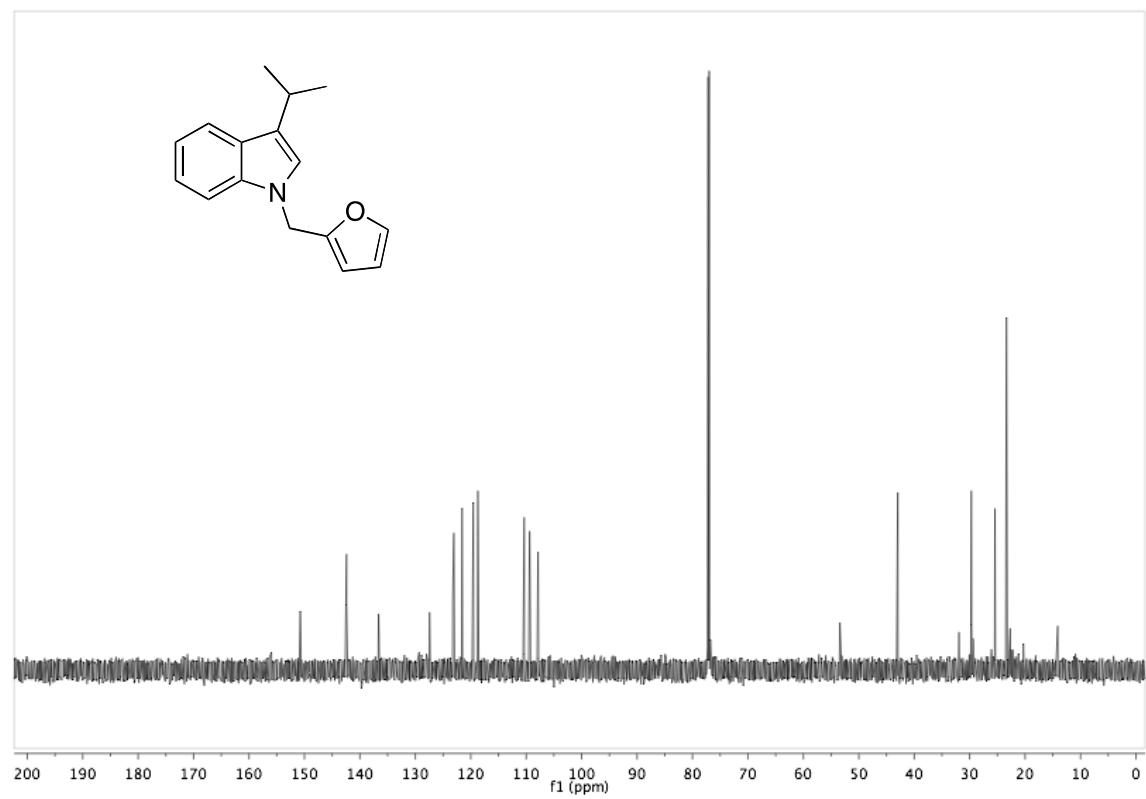

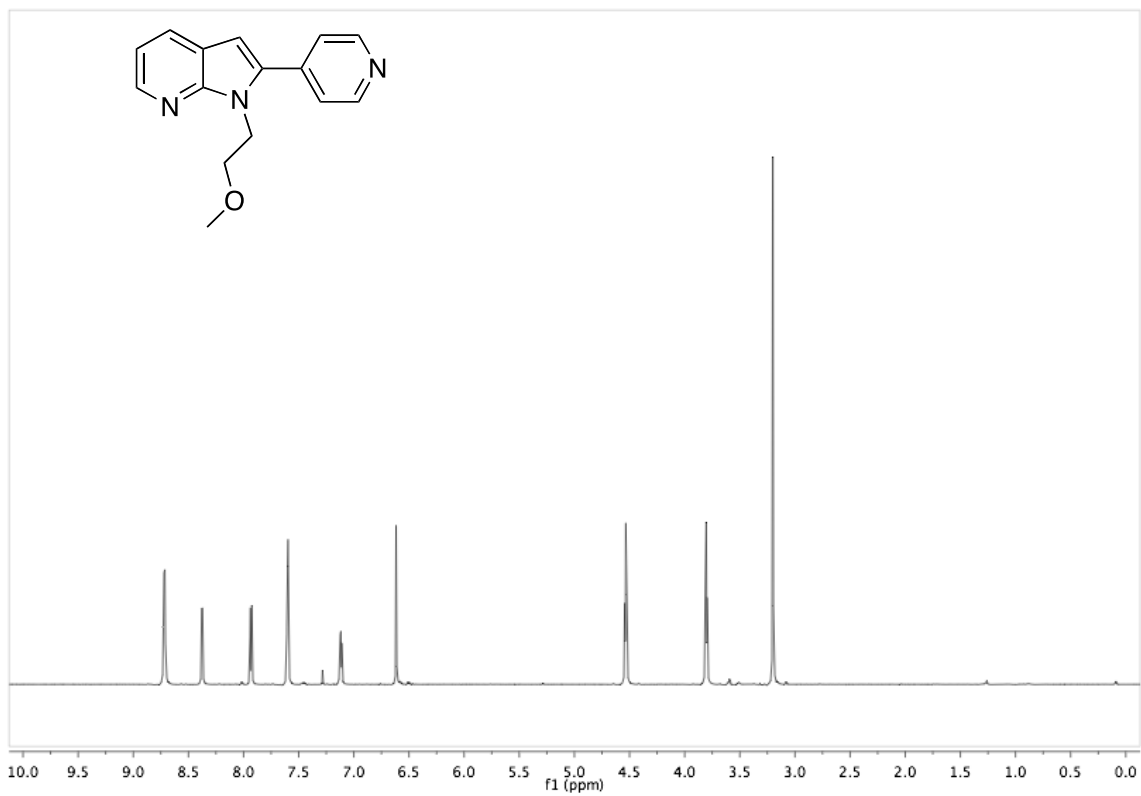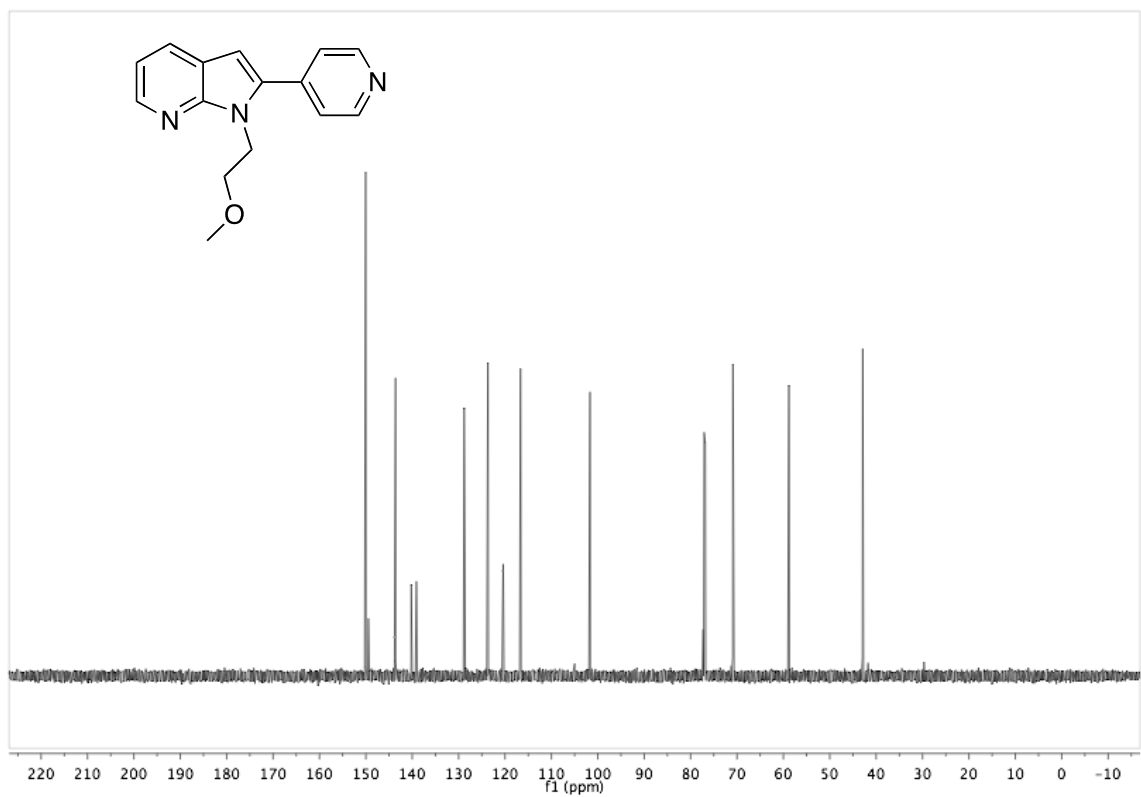

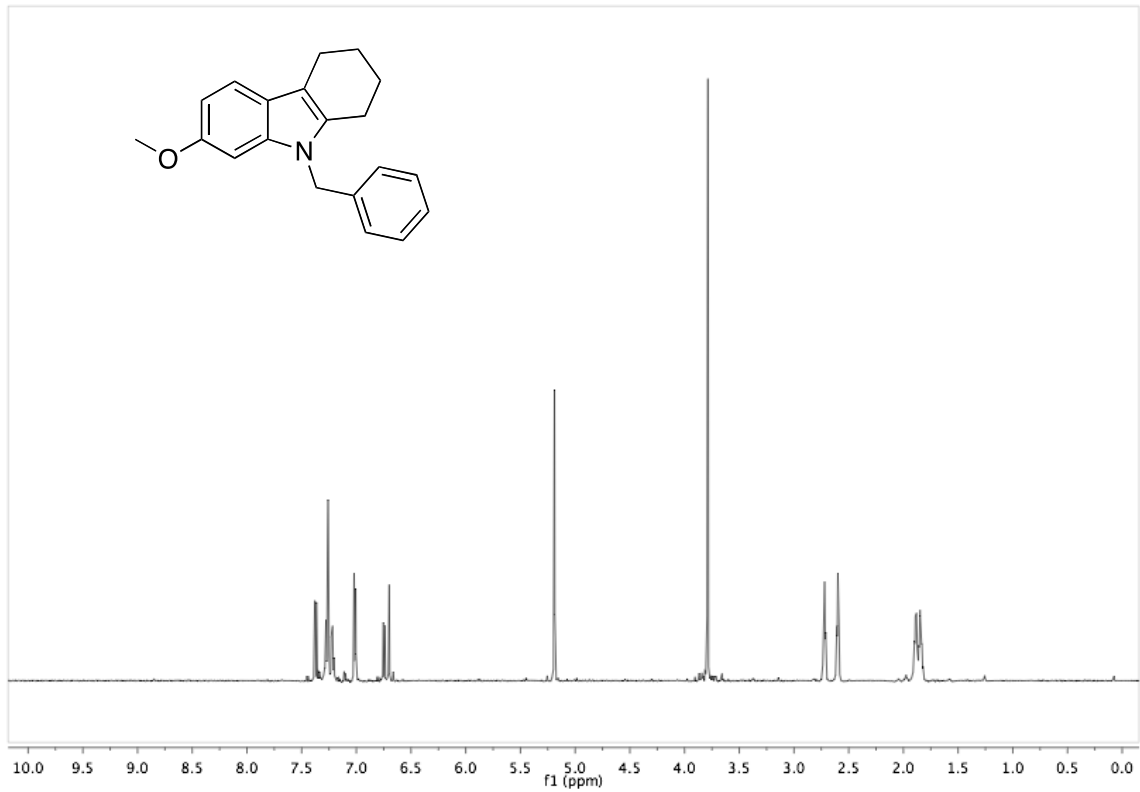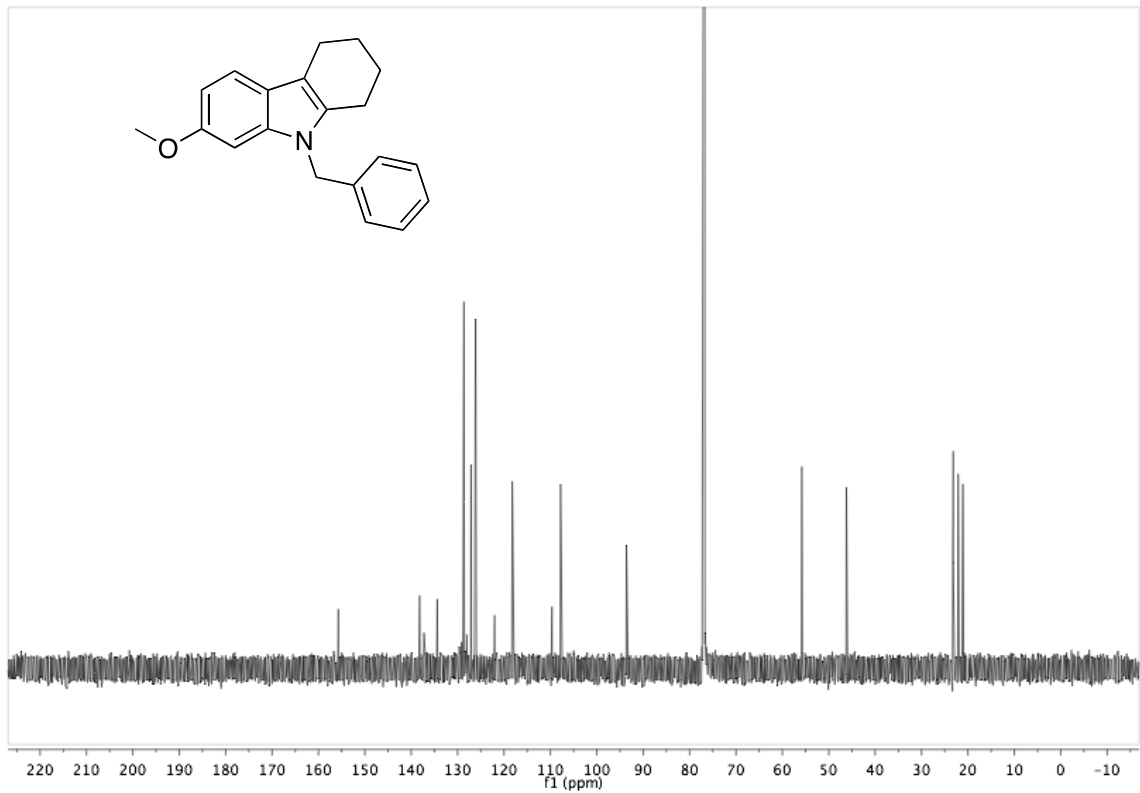

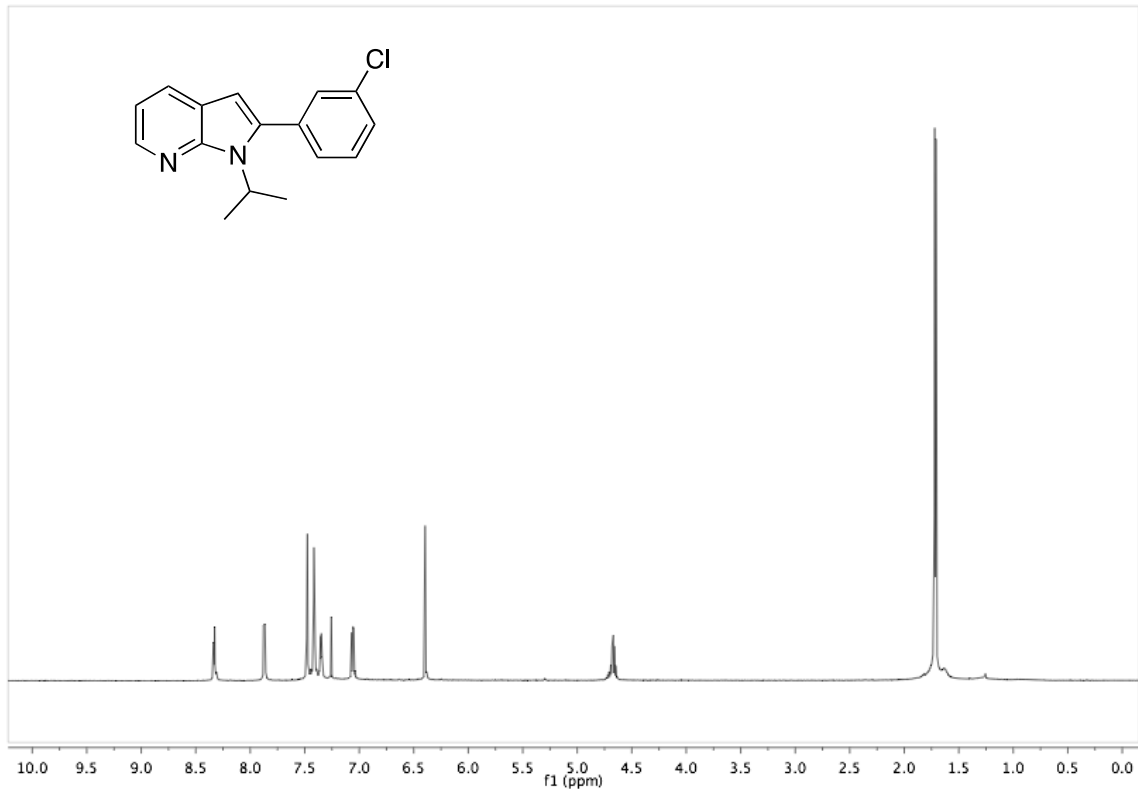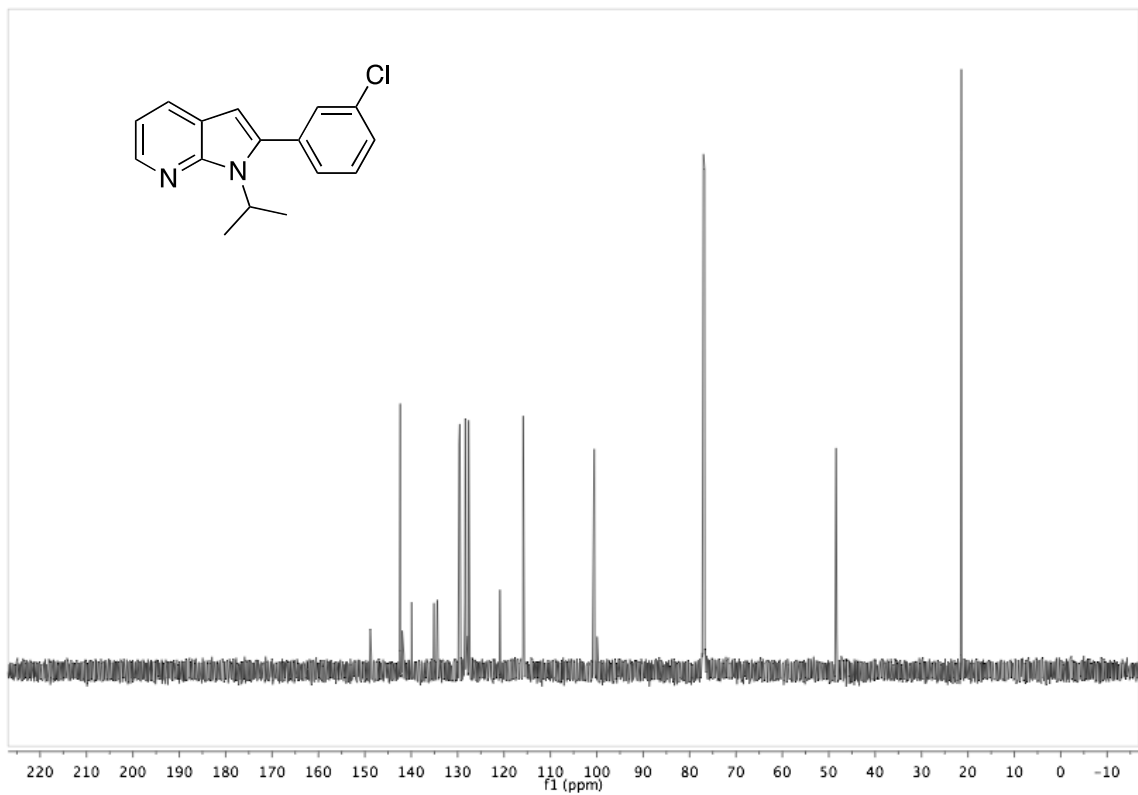

Supplement: NIHMS416947-supplement-Supporting_Information.pdf [file NIHMS416947-supplement-Supporting_Information.pdf]
